1 **All-Flesh Tomato Regulated by Reduced Dosage of *AFF* Provides New Insights into Berry**  
2 **Fruit Evolution**

3 Lei Liu<sup>1</sup>, Kang Zhang<sup>1</sup>, JinRui Bai, Jinghua Lu, Xiaoxiao Lu, Junling Hu, Chunyang Pan, Shumin  
4 He, JialeYuan, Yiyue Zhang, Min Zhang, Yanmei Guo, Xiaoxuan Wang, Zejun Huang, Yongchen  
5 Du, Feng Cheng\*, Junming Li\*

6  
7 Key Laboratory of Biology and Genetic Improvement of Horticultural Crops of Ministry of  
8 Agriculture, Institute of Vegetables and Flowers, Chinese Academy of Agricultural Sciences,  
9 Beijing 100081, China

10

11 <sup>1</sup> These authors contributed equally to this article.

12 \*Correspondence: Junming Li ([lijunming@caas.cn](mailto:lijunming@caas.cn)) and Feng Cheng ([chengfeng@caas.cn](mailto:chengfeng@caas.cn))

13

14

15 **Running Title:** SV regulates locule gel formation in tomato

16

17 **One Sentence Summary:** The sequence deletion that occurred in the cis-regulatory region of  
18 *AFF*—the core node of locule tissue liquefaction determined here—reduced its expression dosage,  
19 and produced all flesh fruit tomato.

20

21

22 **ABSTRACT**

23 The formation of locule gel is not only an important developmental process in tomato but also a  
24 typical characteristic of berry fruit. In this study, we collected a tomato material that produces  
25 all-flesh fruits (*AFF*), whose locule tissue remains in a solid state during fruit development. We  
26 built genetic populations to fine map the causal gene of *AFF* trait, investigate the function of *AFF*  
27 gene, and identified it as the causal locus conferring the locule gel formation. We determined the  
28 causal mutation as a 416-bp deletion that occurred in the promoter region of *AFF*, which reduces  
29 the expression dosage of *AFF*. The 416-bp deleted sequence has a high level of conservation  
30 among closely related Solanaceae species, as well as in the tomato population. The activity of the  
31 416-bp deletion in down-regulating gene expression was further verified by the relative activity in  
32 a luciferase experiment. Furthermore, with the BC<sub>6</sub> NIL materials, we reveal that the reduced  
33 expression dosage of *AFF* does not impact the normal development of seeds, while produces  
34 non-liquefied locule tissue, which is distinct from that of the normal tomatoes in terms of  
35 metabolic components. Based on these findings, we propose that the *AFF* gene is the core node in  
36 locule tissue liquefaction, whose function cannot be compensated by its paralogs *TAG1*, *TAGL1*,  
37 or *TAGL11*. Our findings provide clues to investigate fruit type differentiation among Solanaceae  
38 crops, and also contributes to the breeding application of all flesh fruit tomatoes for the tomato  
39 processing industry.

40

## 41 INTRODUCTION

42 Locule gel is a typical characteristic of berry fruit. As the model plant for study of the fruit  
43 development and ripening, tomato (*Solanum lycopersicum*) fruit has clear tissue distribution and  
44 structure (Czerednik et al., 2015; Huber and Lee, 1986; Joubès et al., 1999). A mass of  
45 information on tomato fruit development has been documented but is mainly focused on fruit type,  
46 fruit weight, and fruit ripening. There is very limited evidence regarding the regulation of locule  
47 gel formation and development (Lamia et al., 2015; Lin et al., 2014; Seymour et al., 2008; Zhu et  
48 al., 2018).

49 Tomato locule tissue, which is the second most abundant tissue in tomato fruit, represents  
50 23% (w/w) of the fruit fresh weight (Mounet et al., 2009). The formation of locule tissue has been  
51 proved as a complex process involving a series of physiological and biochemical changes that  
52 play a critical role in fruit growth and maturation (Lamia et al., 2015; Lemaire-Chamley et al.,  
53 2005; Mounet et al., 2009). Generally, tomato locule tissue derives from the placenta and grows  
54 up around the ovules (Davies and Cocking, 1965; Sicard et al., 2010), encloses the developing  
55 seeds, undergoes extensive processes of expansion and liquefaction, and turns into a jelly-like  
56 homogenous tissue that is composed of thin-walled and giant cells (Atherton and Rudich, 1986;  
57 Cheng and Huber, 1996; Joubès et al., 1999). However, the detailed process of its differentiation  
58 and formation during the development of tomato fruits remains unknown. The naturally mutated  
59 ‘All-flesh fruit’ (briefly named as AFF) tomato does not produce locule gel (jelly-like tissue)  
60 surrounding the seeds and completely changes the structure of locule tissue in tomato fruits  
61 (Macua et al., 2015; Silvestri, 2006). This might provide an ideal material to uncover the complex  
62 mechanism involved in the process of locule development. This mutation also offers several  
63 advantages for the tomato processing industry such as its high solid content, improved firmness,  
64 long shelf-life, color, and flavor over wild-type tomato (Macua et al., 2015; Silvestri, 2006; Zhang  
65 et al., 2019). Therefore, the exploration of AFF may be quite important, not only for the  
66 elucidation of berry fruit formation, but also for breeding programs.

67 Commonly, phytohormones and cell wall-modifying enzymes have been considered to play  
68 important roles in locule gel formation. The evidence clearly indicates that IAA, GA, and ABA  
69 presented high levels in seeds were transported to the surrounding tissues and then participated in

70 inducing and regulating the development of locule tissue (Kumar and Khurana, 2014;  
71 Lemaire-Chamley et al., 2005; Mounet et al., 2009; Sofia et al., 2007). However, it was verified  
72 that ethylene and IAA do not control the determination and liquefaction of locule gel in tomato  
73 fruit (Brecht, 1987; Gillaspay et al., 1993; Qin et al., 2012). Rather, the formation of locule gel  
74 might be related to the ripening and softening processes of fruits because they are accompanied by  
75 the dissolution of pectin deglycosylation and hemicellulose, which are the main components of the  
76 cell wall matrix, mainly catalyzed by polygalacturonase (PG) and pectinmethylesterases (PME or  
77 PE) (Bapat et al., 2010; Cheng and Huber, 1997; Nunan et al., 1998). However, PG and PME  
78 mainly change the texture of fruit and do not determine the process of locule gel formation  
79 (Tieman et al., 1992; Uluisik et al., 2016). Hence, the initial period of locule gel determination  
80 may involve a mechanism that is different from the classic phytohormones or PME —  
81 D-galacturonanase scenario.

82 The well-known floral ‘ABCDE’ model was established to elucidate the molecular  
83 mechanism of floral organ development and differentiation. In this model, ABC-class genes are  
84 mainly responsible for the formation of sepals, petals, and stamens, while the D-class genes,  
85 which belong to the AGAMOUS (AG) family, manipulate the floral organ identity specification,  
86 tissue expansion, and fruit maturation in fleshy fruits (Dreni and Kater, 2014; Huang et al., 2017;  
87 Huang et al., 2017; Itkin et al., 2010; Vrebalov et al., 2009; Xu and Chong, 2015). Among D-class  
88 genes, *AGL1* and *AGL11* specifically contribute to the formation of seeds, the ovule, and funiculus,  
89 regulate the expansion and maturation of the carpel and fruit, and promote the development of  
90 seeds. For example, as the first set of D-class MADS-box genes reported in petunia, *FLORAL*  
91 *BINDING PROTEIN 7 (FBP7)* and *FBP11* are expressed specifically in ovule differentiation and  
92 formation and also participate in seed and coat development (Angenent et al., 1995; Colombo et  
93 al., 1995). Another orthologous gene, *SEEDSTICK (STK)*; previously *AGL11*, isolated from  
94 Arabidopsis, also participates in the initiation and differentiation of ovules and affects seed  
95 germination (Ezquer et al., 2016; Favaro et al., 2003; Pinyopich et al., 2003). Suppression of the  
96 *STK* orthologous gene *AGL11* triggers seedless fruit in tomato and grape (Ocares and Mejía,  
97 2016), whereas overexpression of the tomato *AGL11* gene results in dramatic modifications of  
98 flower and fruit organization (Huang et al., 2017). In addition, genes *SHATTERPROOF1 (SHP1)*

99 and *SHP2* act redundantly with *STK* in promoting ovule identity, control the dehiscence zone  
100 differentiation and promote the lignification of adjacent cells at the carpel/ovule boundary  
101 (Liljegren et al., 2000; Pinyopich et al., 2003). Similarly, in tomato fruit, *Tomato*  
102 *AGAMOUS-LIKE1* (*TAGLI*), an *SHP* orthologous gene, controls fruit expansion and fleshiness  
103 (Vrebalov et al., 2009). More recently, the D-class gene AGAMOUS MADS-box protein 3  
104 (*SIMBP3*)—a paralog of *TAGLI*—showed direct evidence for the liquefaction of tomato locule  
105 tissue (Zhang et al. 2019). Moreover, although previous studies indicated that *AGL* genes can  
106 control the formation of fleshy fruit, and *slMBP3* impacts the formation of locule gel in tomato,  
107 the genetic evolution and regulatory mechanism of the transformation from juiceless to juicy fruit  
108 are still unclear.

109 Moreover, as a common feature, all these D-class genes participate in seed development,  
110 such as the *stk* mutant, which reduces seed germination efficiency; *AGL11*, which prevents plants  
111 from producing seeds; and *slmbp3* RNAi plants, which develop seeds that are not able to  
112 germinate. In contrast, the naturally mutated *aff* as aforementioned produces normal seeds with a  
113 high germination rate. Therefore, this *AFF* mutation without gel formation provides additional  
114 information for addressing ovule development, especially the locule gel formation, without  
115 negative effects on the normal development of seeds.

116 In this study, the *aff* gene was identified by combining a genetic analysis and map-based  
117 cloning approach. We found that a novel structural variant (SV)—a 416-bp sequence  
118 deletion—occurred in the conserved cis-regulatory region of the *aff* gene. This deletion led to the  
119 suppressed expression of the *aff* gene, and its reduced dosage then caused the all-flesh fruit  
120 phenotype but with well-developed seeds. To understand the regulatory pathways and effects on  
121 fruit quality caused by the *aff* gene, combined transcriptome and metabolome analyses were  
122 performed with the near-isogenic lines (NILs) of the all-flesh tomato material. The metabolic  
123 components showed a distinct difference between the mutation and the wild type. Additionally,  
124 comparative evolutionary analysis of the *aff* gene and its cis-regulatory sequence in the nightshade  
125 family and the tomato population strongly suggests that the *aff* gene is important for fruit  
126 development. These findings not only provide useful information for tomato breeding programs  
127 but also provide novel insights into the locule gel formation of berry fruits.

## 128 **RESULTS**

### 129 **The All-Flesh Fruit Trait is Controlled by a Single Recessive Locus**

130 To investigate the genetic characteristics of the *aff* genotype, we built an F<sub>2</sub> population using the  
131 *aff* genotype 06-790 as the P1 parent and WT LA4069 as the P2 parent. A fruit trait survey of the  
132 F<sub>2</sub> population showed that the ratio of WT fruit samples to *aff* samples was 150:41, consistent with  
133 a 3:1 segregation ratio (chi-squared test:  $\chi^2 = 1.176$ , non-significant) (**Table 1**), which suggests a  
134 single recessive genetic model of the all-flesh fruit trait. To further confirm this result, we built a  
135 BC<sub>1</sub>P1 population; a survey of the progenies showed that the ratio of WT fruit samples to *aff*  
136 samples was 46:42, conforming to a 1:1 segregation ratio (chi-squared test:  $\chi^2 = 0.102$ ,  
137 non-significant) (**Table 1**). We built a BC<sub>1</sub>P2 population, and all progenies of this population  
138 presented WT fruits. In conclusion, these data together confirm that the all-flesh fruit trait is  
139 conferred by a single recessive mutation.

### 140 **The Locule cell in *aff* Maintains a Complete Structure during Fruit Ripening**

141 To understand the possible time-point for the locule gel formation, we observed the difference in  
142 locule tissue between the *aff* genotype and WT fruits by crosscutting the fruits at an interval of  
143 every five days. We found that there was no jelly-like tissue formed in the locule cavity area  
144 during the whole development process (fruit setting to ripening) of the *aff* genotype (**Fig. 1a**). In  
145 contrast, obvious jelly-like tissue of the WT was observed 25 days after flowering (DAF) and  
146 reached complete liquefaction after the mature green (MG) stage (**Fig. 1a**). This jelly-like tissue  
147 was composed of distinctly shaped, thin-walled, and highly vacuolated cells. These findings  
148 indicate that 25 DAF might be an important time-point for the formation and development of  
149 locule gel in tomatoes. We further checked the 25 DAF samples of the WT and all-flesh tomato  
150 fruits with paraffin sectioning by microscopic examination. The individual locule cells of the WT  
151 tomato fruit continued to collapse and showed a tendency to fracture inter-cellularly within the  
152 plane of the cell wall at the MG stage (**Fig. 1b**), which is consistent with previous reports (Cheng  
153 and Huber, 1996; Lemaire-Chamley et al., 2005). However, these distinct changes did not occur in  
154 the cells of the *aff* locule, while it still maintained a complete structure in *aff* fruits. This made the

155 morphology of the locule tissue in *aff* tomatoes more like that of the placenta tissue. Except for the  
156 lack of locule gel formation, the *aff* genotype had a similar ripening process as that of WT tomato.  
157

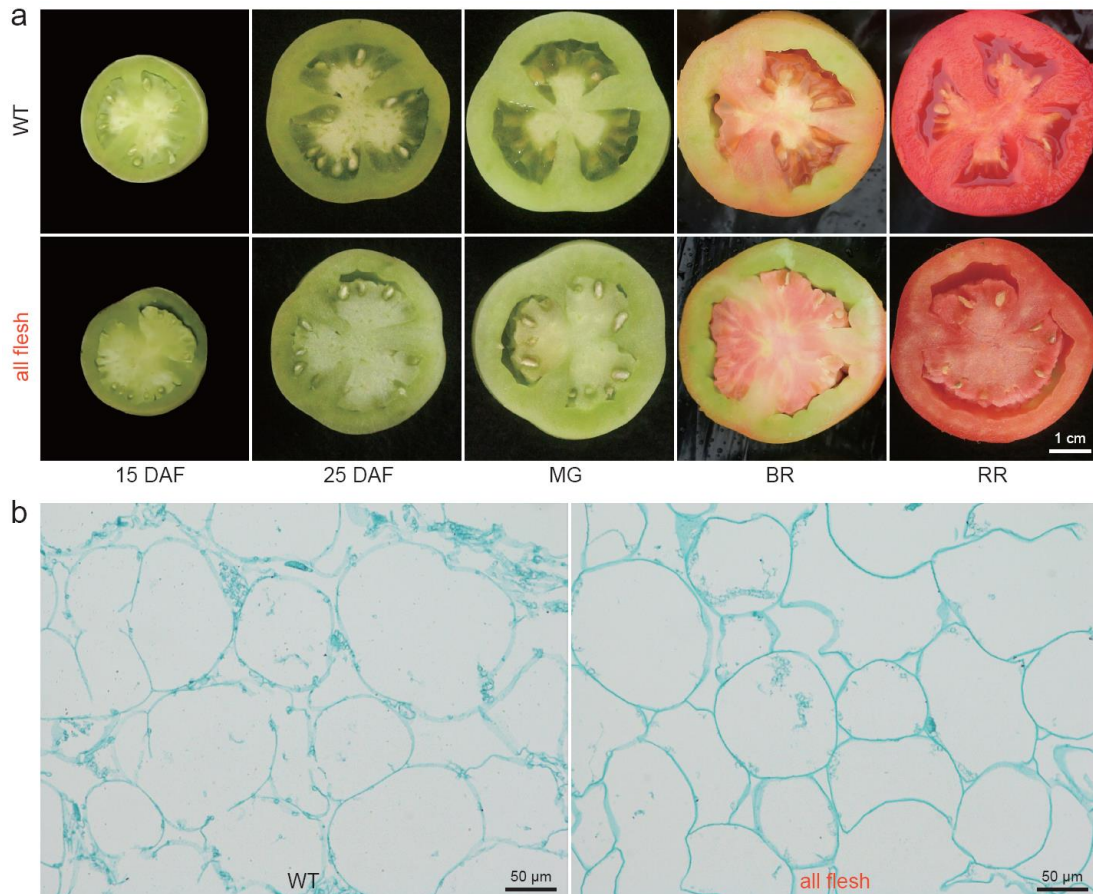

158  
159 **Figure 1. Morphology and Micrograph of the Locule Tissues of Normal (WT) and All-Flesh**  
160 **Fruit Tomato.** (a) The appearance of locule tissue at different developmental stages of WT  
161 tomato LA4069 and all-flesh fruit tomato 06-790. (b) The cell structure of locule tissues of WT  
162 and all-flesh fruit tomato at their mature green stage. Scale bars: (a), 1 cm; (b), 50 μm.

163

### 164 **A Large Sequence Deletion in the Promoter of the *AFF* gene is identified in All-Flesh Fruit** 165 **Tomato**

166 A bulked segregant analysis sequencing (BSA-seq) strategy was applied to locate the causal gene  
167 in the *AFF* tomato genome. Using the genome sequence of *Solanum lycopersicum* (SL4.0 ITAG4.0)  
168 as the reference, we called out 298,942 SNP variants that were polymorphic between P1 and P2  
169 but homozygous in each of the two parental genomes. These SNP loci were further used in the

170 SNP index analysis (Takagi et al., 2013) with their genotype data from the *aff* genotype pool and  
171 the WT pool. Using the measure  $\Delta(\text{SNP index})$ , we detected a significant signal ( $\Delta_{\text{index}}=1.448$ ,  
172 above the 99% confidence level) located between 37.25 Mb and 37.75 Mb on chromosome six  
173 (**Fig. 2a**), and 21 SNPs were located in this region. The average SNP index of the *aff* genotype  
174 pool in this region was 0.98, of which 16 SNPs indexes reached 1; the average SNP index of the  
175 WT pool was 0.32. The difference in the average SNP index between the two pools was 0.66.

176 Genetic linkage analysis of two populations ( $F_2$  with 215 individuals and  $BC_2S_1$  with 249  
177 individuals as listed in the methods) was used to fine-map the *AFF* gene. Molecular markers  
178 (**Table S1**) were selected from these polymorphic SNPs and SVs between P1 and P2 and were  
179 genotyped by PCR and KASP. The results showed that the *AFF* gene was mapped to the same  
180 region as that in BSA-Seq (**Fig. 2b**). Based on the physical location of these markers, as well as  
181 the genotype of each individual derived from the  $BC_2S_1$  population, the *AFF* gene was finally  
182 mapped between markers SNP-14 and SNP-15, corresponding to the physical location of  
183 SL4.0ch06:37,945,500-38,129,705, which is about 184.2 kb and harbors 27 genes (**Fig. 2c and**  
184 **2d**). The variants in this region were further deciphered. Only a 416-bp deletion was found in  
185 SL4.0ch06:38,062,128-38,062,543, lying in the intergenic region. Following the gene model  
186 information in the tomato reference genome, we found that this 416-bp deletion was located 1,775  
187 bp upstream of the gene *Solyc06g064840* (**Fig. 2e**). Based on the 416-bp deletion, a marker named  
188 SV-12 was designed, and two populations were screened by this marker. We found that SV-12  
189 completely co-segregated with all-flesh individuals (**Fig. 2f**). This evidence determined  
190 *Solyc06g064840* as the candidate gene, which belongs to the AGAMOUS-like MADS-box  
191 transcription factor gene family and is also named *SIMBP3*. *SIMBP3* is specifically expressed in  
192 the developing locule (include the seeds) of tomato fruits (**Fig. S1-2**) (Fernandez-Pozo et al., 2017;  
193 Koenig et al., 2013).



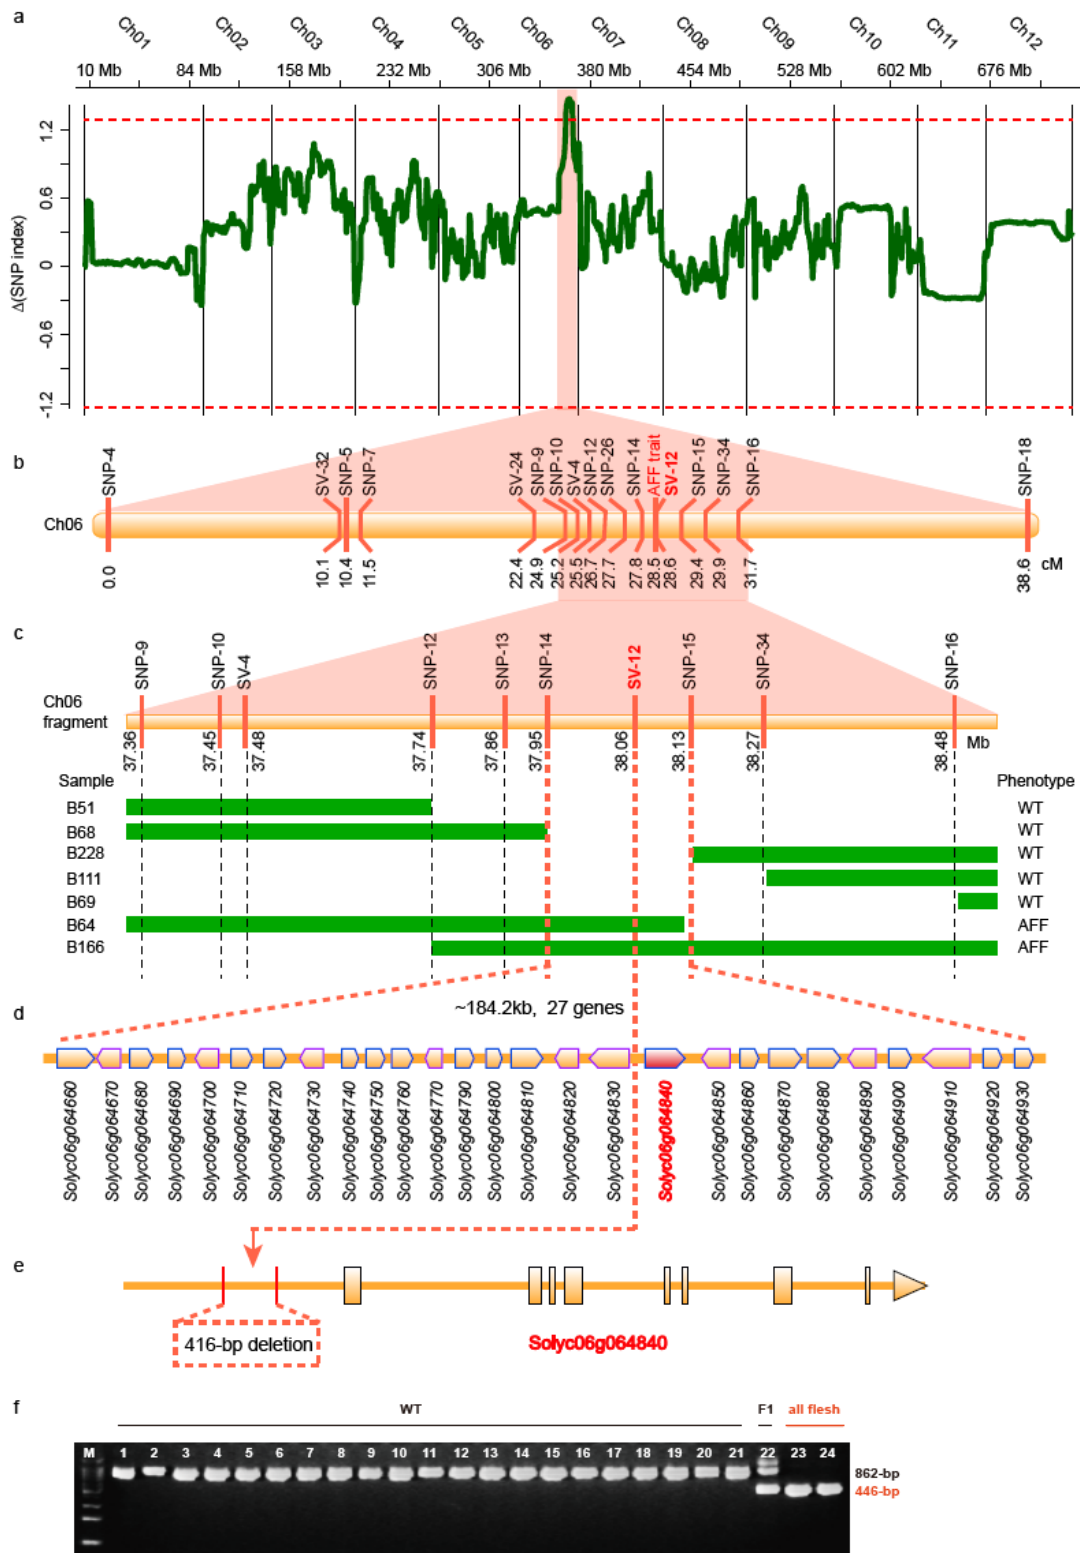

194

195 **Figure 2. Map-based Cloning of the AFF Gene.** (a)  $\Delta(\text{SNP index})$  from BSA-Seq. The x-axis is

196 the physical position of tomato chromosomes; the y-axis is the value of the SNP-index. (b) Initial

197 mapping of the AFF gene using 215  $F_2$  plants derived from a cross between 06-790 and LA4069.

198 (c) Genotypes and phenotypes of homozygous recombinant plants derived from 249 BC2S1 plants

199 generated by continued backcrossing of 06-790 to H1706 (B51, B68, B228, B111, and B69 are  
200 normal lines; B64 and B166 are all-flesh fruit lines). **(d)** Annotated gene models in Tomato SL4.0  
201 ITAG4.0 (H1706) in the mapping region. These local genes are indicated by rectangles with  
202 arrows. **(e)** Gene structure of *AFF*. The gray dashed-box represents the SV of 416-bp deletions in  
203 the cis-regulatory region of the *AFF* gene. **(f)** The PCR results of different tomato varieties or  
204 lines using the marker SV-12 designed by the 416-bp deletion. M: 100-bp DNA ladder.

205

### 206 **Gene Editing of *AFF* Confirmed its Function in locule Gel Formation of Tomato**

207 To prove that *Solyc06g064840* is the causal gene of the *aff* tomato genotype, an 18-bp sgRNA that  
208 targeted the second exon of the *AFF* gene was designed to construct a CRISPR-Cas9 expression  
209 vector MSG8124/8125 and then introduced into the *S. lycopersicum* cv. Micro-tom (wild type) by  
210 *Agrobacterium tumefaciens* (**Fig. 3a-b**). These transgenic plants were confirmed by PCR  
211 amplification and DNA sequencing (**Table S2**). As shown in **Fig. 3b**, the *AFF*-Cr5 mutant  
212 produced the expected all-flesh fruits without the jelly-like substance compared to the WT. We  
213 also constructed the recombinant plasmid 35S::5'UTR+ *aff*-CDs::GFP and introduced it into  
214 Micro-tom to obtain transgenic plants with over-expression of the *Solyc06g064840* gene. As  
215 shown in **Fig. 3c**, the *AFF*-overexpression transgenic T<sub>1</sub> homozygous lines developed larger  
216 jelly-like substances in the locule compared to the normal locule gel in the WT Micro-tom tomato  
217 fruits. These results indicate that the *AFF* gene does possess the key function in locule gel  
218 formation of tomato fruits.

219

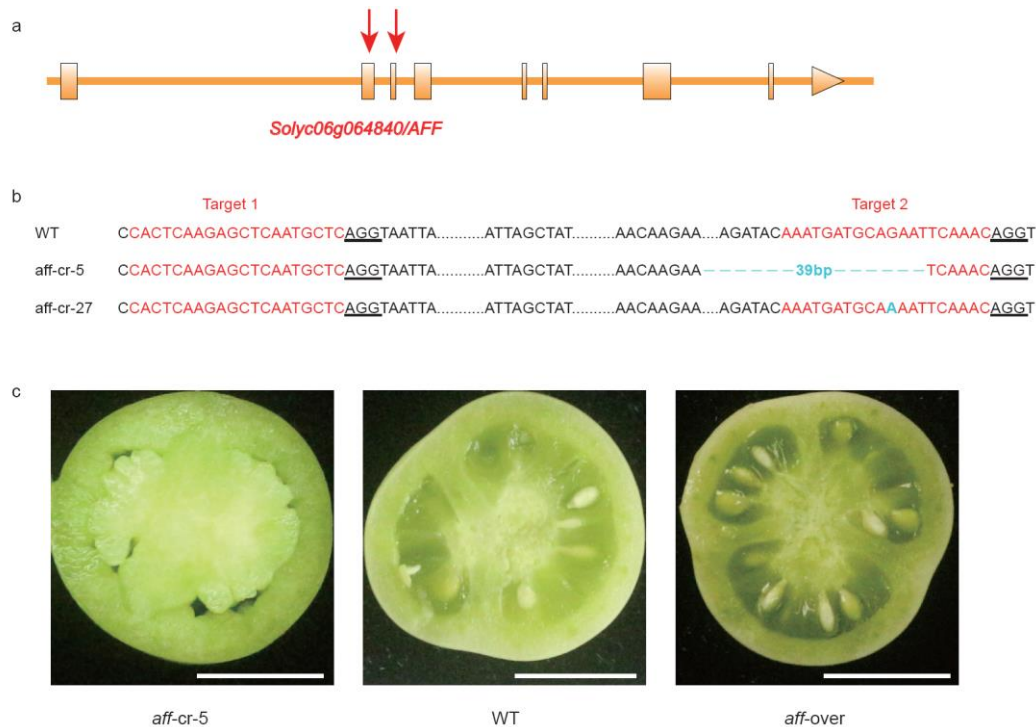

220

aff-cr-5

WT

aff-over

221 **Figure 3. Characterization of CRISPR/Cas9-*aff* (*aff-cr*) Lines and Over-expression (*aff-over*)**

222 **Lines.** (a) Schematic illustrating single-guide RNA targeting the *AFF* coding sequence (red

223 triangle). (b) *aff-cr* mutants generated using CRISPR/Cas9. The red lines indicate the target sites

224 of the guide RNAs. The nucleotides underlined in black bold font represent the

225 protospacer-adjacent motif (PAM) sequences. *aff-cr* alleles identified by cloning and sequencing

226 PCR products of the *AFF*-targeted region from two T<sub>0</sub> plants under the MicoTom background. (c)

227 Representative fruit transection from CRISPR/Cas9-*aff* (*aff-cr*) lines compared with the wild-type

228 (WT) and over-expression (*aff-Over*) lines at 25 DAF. Scale bars: 1 cm.

229

### 230 **The Deleted Promoter Sequence Shows Strong Conservation**

231 To understand the detailed function of the 416-bp deletion, the 2 kb sequence (416-bp deletion

232 included) was analyzed by the promoter prediction tool TSSP of the PlantProm DB database

233 (Shahmuradov et al., 2012) and the PlantCARE database (Lescot et al., 2002). We found that

234 functional elements including the TATA box and CAAT box (**Table S3**) were involved in this

235 deleted sequence. Therefore, it is interesting to investigate the conservation status of the 416-bp

236 sequence across Solanaceae crops. To do this, we selected five genomes from four Solanaceae

237 crops, including two tomato genomes *S. lycopersicum* and *S. pennellii*, as well as genomes of

238 potato (*Solanum tuberosum*), capsicum (*Capsicum annuum*), and eggplant (*Solanum melongena*).  
239 We then determined the syntenic orthologous genes of *AFF* in the five genomes selected  
240 (**Methods**), which are *Sopen06g023350*, *Sotub06g020180*, *Capang01g002169*, and  
241 *Sme2.5\_02049.1\_g00007.1*, in *S. pennellii*, *S. tuberosum*, *C. annuum*, and *S. melongena*,  
242 respectively. The promoter sequences of these five syntenic genes were extracted from  
243 corresponding genomes and aligned using the MUSCLE tool (Edgar, 2004). Based on the results  
244 of multiple sequence alignment, we estimated the conservation level of these promoter sequences.  
245 As shown in **Fig. 4a**, using the revised  $\pi$  as the measure (**Methods**) and the threshold of 0.3, we  
246 determined that five main local regions showed a relatively higher conservation level (low  
247 mismatch ratio in multiple sequence alignment) in the promoter sequences of these Solanaceae  
248 crops. These five regions should have important roles in regulating the expression of associated  
249 genes. Moreover, the 416-bp sequence deletion was exactly located at one of the two most  
250 conserved regions (the blue bars in **Fig. 4a**). This suggests that the deletion may have a large  
251 effect in altering the expression of the gene *AFF* in *aff* tomato.  
252

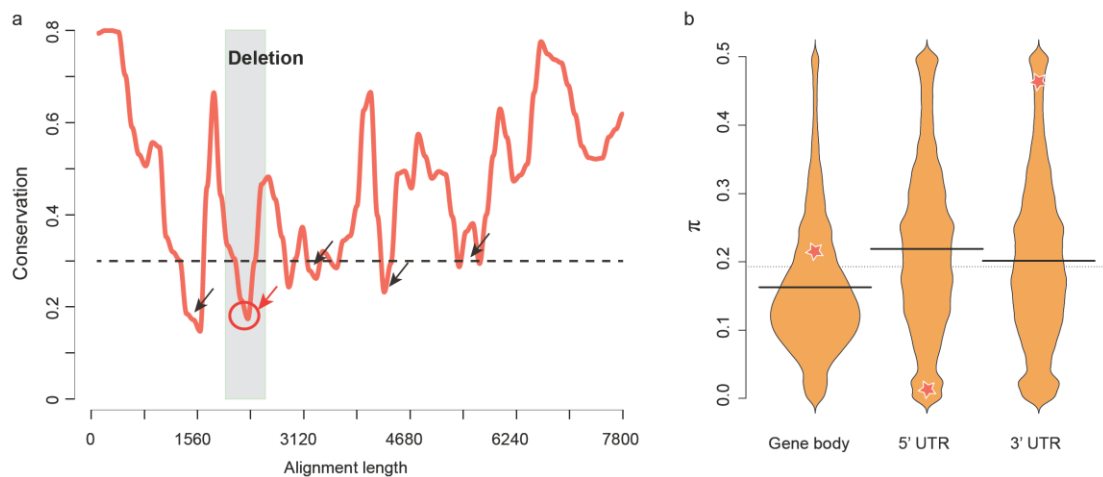

253

254 **Figure 4. The Sequence Conservation of the *AFF* Promoter in *Solanaceae* Species and the**  
255 **Tomato Population. (a)** Sequence conservation of *AFF* orthologous genes among five  
256 *Solanaceae* species. **(b)** Beanplot of  $\pi$  values for the three regions: the gene body, 5'UTR, and  
257 3'UTR of all genes. The 5'UTR region of gene *AFF* shows strong conservation compared to other  
258 genes in the tomato population. The yellow stars show the  $\pi$  values of the three regions of the *AFF*  
259 gene.

260

261 To further check the conservation and importance of the promoter region of *AFF* within the  
262 tomato population, we analyzed its sequence diversity using the population variome dataset on  
263 360 tomato accessions that was published previously (Lin et al., 2014). Generally, we estimated  
264 the sequence diversity (selection sweep) by calculating  $\pi$  for regions of the gene body, 5'UTR, and  
265 3'UTR for each of the 33,562 tomato genes (**Methods**) and checked the selection strength, i.e., the  
266 diversity level of the *AFF* gene under the background of all tomato genes. As shown in **Fig. 4b**,  
267 the yellow star shows the location of the *AFF* gene in the frequency distribution of the  $\pi$  values  
268 calculated from all genes. For *AFF*, the  $\pi$  value of the gene body is 0.21, slightly larger than the  
269 mode value of all genes, while its 3'UTR has a  $\pi$  value of 0.46, which indicates higher diversity,  
270 whereas its 5'UTR has a  $\pi$  value of 0.026, less than 93.80% of all other genes, suggesting strong  
271 selection pressure against mutations in the promoter region of the *AFF* gene in the tomato  
272 population. These findings together support the importance of sequence conservation in the  
273 promoter region of *AFF*, which further suggests that the 416-bp deletion may have a significant  
274 impact on the function of *AFF*.

### 275 **The Promoter Sequence Deletion Down-regulates the Expression Level of the *AFF* gene**

276 We investigated the expression of *AFF* by quantitative real-time PCR assay and the dual  
277 luciferase reporter system. First, using the marker of the 416-bp deletion variant, we selected two  
278 *aff* lines (BA-130 and BA-150) and two WT lines (BA-124 and BA-128) from the BC<sub>2</sub>S<sub>1</sub>  
279 population of P1 (06-790) and P3 (H1706). We then performed qRT-PCR analysis to measure the  
280 expression variation of *AFF* in different developmental stages of locule tissues from the four  
281 BC<sub>2</sub>S<sub>1</sub> lines, together with their parental materials P1, P3, and F<sub>1</sub>, as well as another *aff* line  
282 09-1225 and the WT line P2 (LA4069). As shown in **Fig. 5a**, in all of these samples, the gene was  
283 highly expressed on seven DAF and ten DAF and significantly decreased on 15 DAF, which was  
284 synchronous with the differentiation of locule tissues, and is consistent with previous reports  
285 (Fernandez-Pozo et al., 2017; Koenig et al., 2013). More importantly, the expression of *AFF* was  
286 significantly lower in samples of *aff* tomatoes than in WT fruit samples. The all-flesh BC<sub>2</sub>S<sub>1</sub> lines  
287 BA-130 and BA-150 had a significantly lower expression of *AFF* than the WT fruit BC<sub>2</sub>S<sub>1</sub> lines

288 BA-124 and BA-128 (**Fig. 5a**). We further evaluated the transcriptional activity of the promoter  
289 sequences of *AFF* in the WT and *aff* fruit samples, i.e., promoter sequences with or without the  
290 416-bp deletion, by experiments of the relative activity of luciferase (the ratio of luc to Rluc). The  
291 relative activity of luciferase of the all-flesh fruit promoter was significantly lower than that of the  
292 WT promoter (**Fig. 6a**). All of these results indicate that the 416-bp deletion in the promoter  
293 region can significantly decrease the transcription level of *AFF*, and the down-regulated  
294 expression of *AFF* then regulates the formation of all-flesh fruit tomatoes.

295

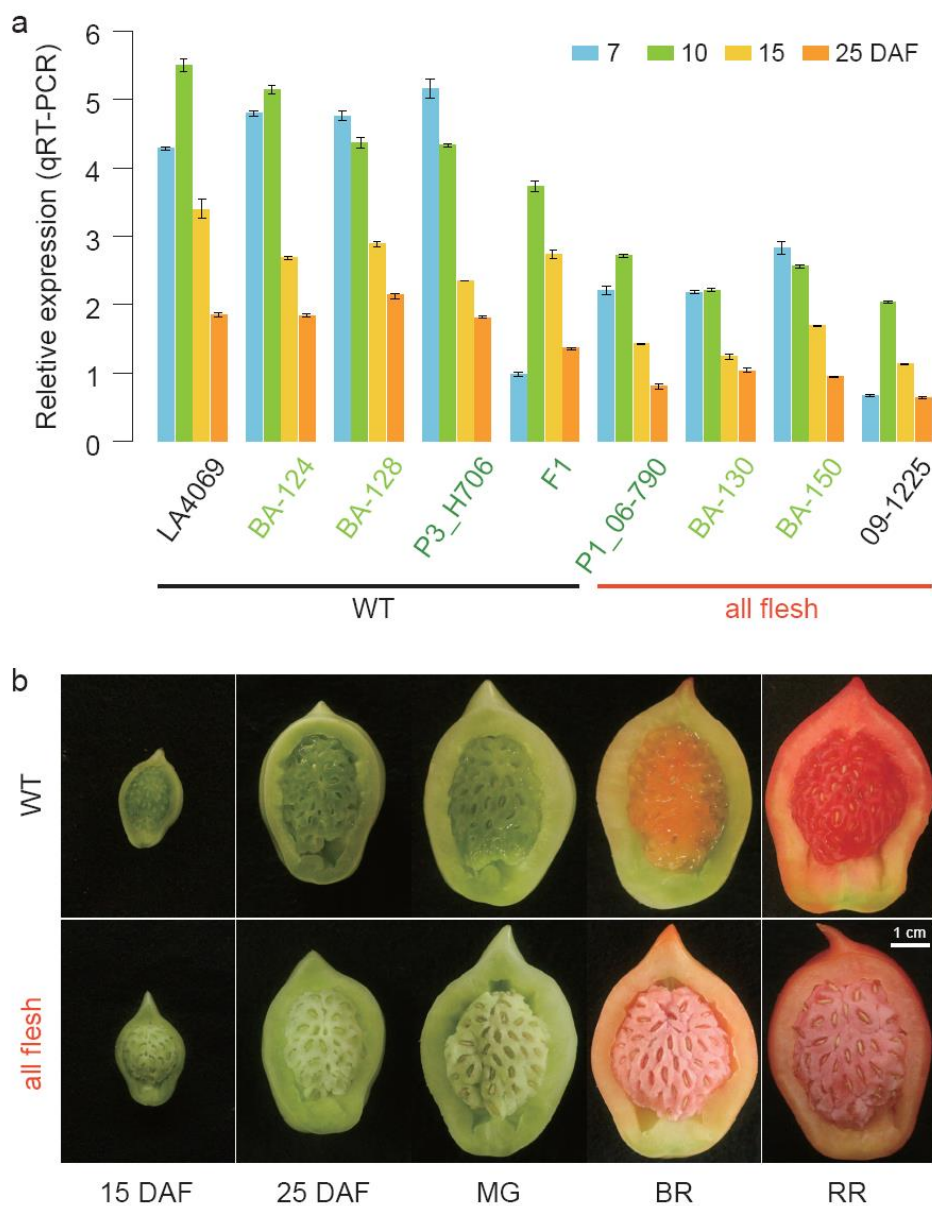

296

297 **Figure 5. The Expression of Gene *AFF* and the Phenotypes of Locule Tissues of WT and**  
298 **All-Flesh Tomato Fruits at Different Development Stages. (a) qRT-PCR of *AFF* transcripts in**

299 different locule tissues and stages from 7 to 25 days after flowering (DAF). BA-130 and BA-150,  
300 all-flesh lines derived from BC<sub>2</sub>S<sub>1</sub> plants generated by the continued backcrossing of 06-790 to  
301 H1706. 09-1225 and 06-790 are all-flesh cultivars. 06-790×H1706, F<sub>1</sub> progeny, the all-flesh line  
302 06-790 was crossed to wild-type H1706. H1706 and LA4069 are normal cultivars obtained from  
303 TGRC. BA-124 and BA-128 are normal lines derived from BC<sub>2</sub>S<sub>1</sub> plants generated by continued  
304 backcrossing of 06-790 to H1706. Note: To normalize the expression data, the *SIFRG27*  
305 (*Solyc06g007510*) gene was used as the internal control (Cheng et al., 2017). The bars represent  
306 the standard deviation. **(b)** The longitudinal section of fruit locule tissue at different stages of the  
307 WT and *aff* NIL (PA-1) created by backcrossing of 06-790 to H1706 for six generations followed  
308 by two generations of selfing. Scale bars: 1 cm.

309

310 Furthermore, we checked the locule tissues of *aff* and WT tomato fruits using the  
311 near-isogenic lines (NILs). The NILs were generated by back-crossing the *aff* tomato material  
312 06-790 to H1706 for six generations (**Methods**), assisted by molecular selection of the 416-bp  
313 deletion marker SV-12. We surveyed these lines with the homozygous status of the 416-bp  
314 deletion and observed that they all produced all-flesh fruit, which is distinct to the WT fruit of  
315 H1706 (**Fig. 5b**), in which the locule tissues of all-flesh tomatoes maintain a solid state during  
316 fruit development, without any jelly tissue formation. Additionally, we also checked the seed  
317 characteristics, thousand-seed weight, and the seed germination activity using the all-flesh fruit  
318 tomato NILs; the seed structure or appearance did not differ between the *aff* fruit lines and the WT  
319 fruit lines (**Fig. S3**). All the *aff* NILs had complete seed hair and coat. As shown in **Fig. 6b-d**, the  
320 all-flesh fruit lines BA-1 and BA-2 had a similar thousand-seed weight, germination index, and  
321 germination rate as that of WT fruit lines BA-4 and BA-6. These results suggest that the deletion  
322 stops the formation of gel in tomato but does not impact the function of *SIMBP3/AFF* involved in  
323 the normal development of seeds. The deletion mutation in the all-flesh fruit was different from  
324 that of the *aff-cr5* plants that cannot produce seeds and the *SIMBP3* RNAi plants whose seeds  
325 cannot germinate (Zhang et al., 2019).

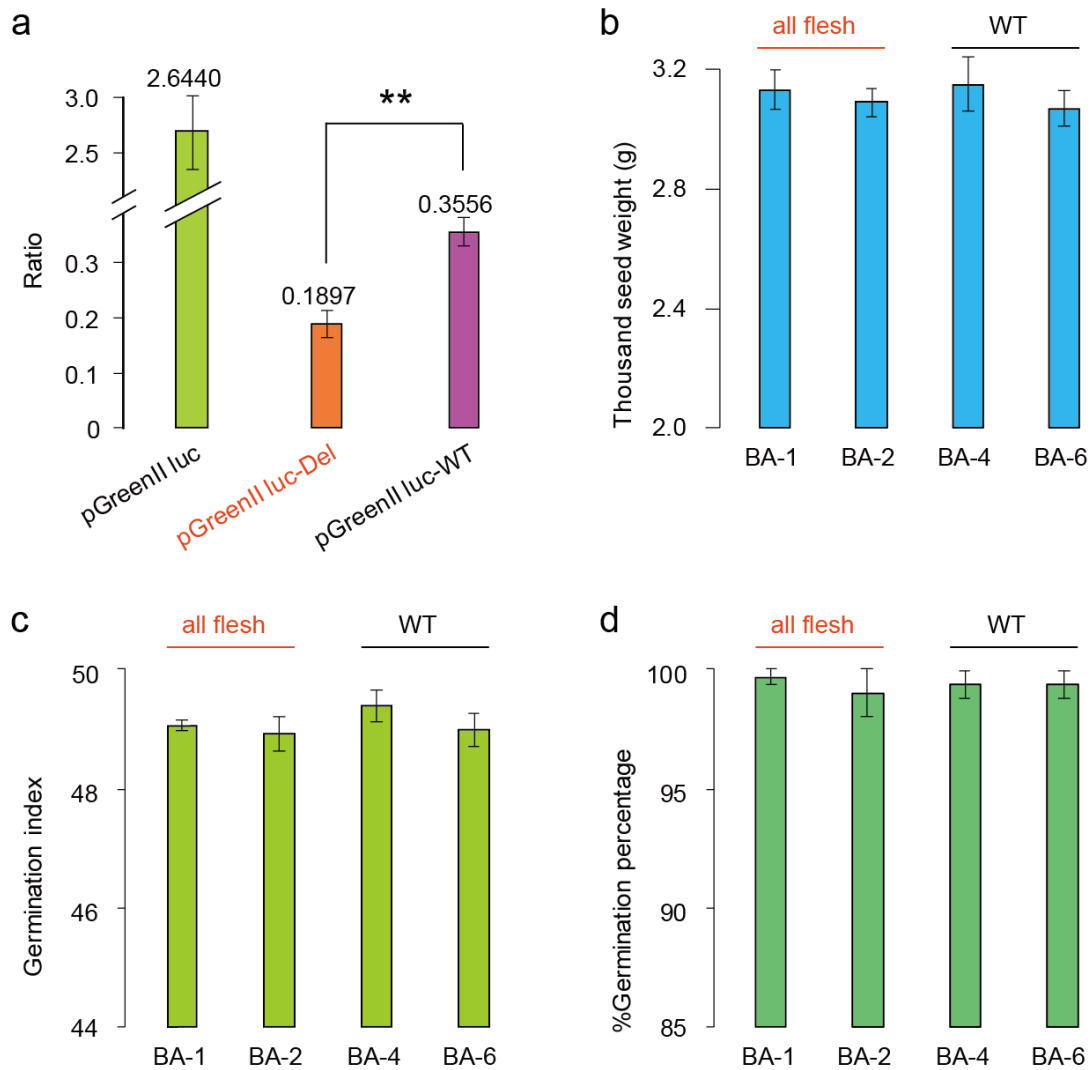

326

327 **Figure 6. The Ratio of Firefly and Renilla Luciferase Signals, as well as the Thousand-Seed**

328 **Weight and the Seed Germination of *aff* NILs.** (a) Relative luciferase activity (the ratio of luc

329 to Rluc) of the two constructs. pGreenII luc, the blank vector with the 35S promoter; pGreenII

330 luc-Del, the vector with the *aff* promoter; pGreenII luc-WT, the vector with the *AFF* promoter.

331 Different letters above the bars indicate statistically significant differences. \*\*: P < 0.01 (Student's

332 t test). (b) The thousand-seed weight of four *aff* NILs. (c) The germination index of four *aff* NILs.

333 (d) The seed germination percentage of four *aff* NILs. BA1-1 and BA2-1 are all-flesh lines

334 derived from BC<sub>6</sub>S<sub>2</sub> plants generated by 06-790 continued backcrossing to H1706; BA4-1 and

335 BA6-1 are normal lines derived from BC<sub>6</sub>S<sub>2</sub> plants generated by 06-790 continued backcrossing to

336 H1706. The bars represent the standard deviation.

337



### 338 **The *AFF* Mutation Largely Alters Gene Expression and Metabolic Components**

339 The reduced expression of *AFF* shut down downstream locule tissue liquefaction-related biology  
340 pathways. A low dosage of *AFF* had an impact on systematic gene expression variations in the  
341 locule tissue of *aff* tomato, i.e., the expression of more genes was down-regulated. We compared  
342 whole genome gene expression patterns between tomato materials HZ106 (WT) and its NIL BA-1  
343 (*aff* line) whose *AFF* gene was replaced by the mutated one with the 416-bp deletion in its  
344 promoter region. mRNA-seq analysis were performed on two tissues, the locule and placenta, for  
345 both the WT and *aff* line, at three time points, i.e., 10, 15, and 25 DAF. Generally, we found that  
346 genes belonging to GO (gene ontology) terms related to lipid metabolism, plant-type cell wall,  
347 phyto-hormones, metabolism and catabolism, flavonoid biosynthesis, glucosyltransferase activity,  
348 and nutrient reservoir activity, were enriched in these differentially expressed gene sets (**Table**  
349 **S4**), as well as KEGG pathways including sugar metabolism and phyto-hormone biosynthesis  
350 (**Table S5**). Among the top 50 enriched GO terms, 1,110 genes were down-regulated, while only  
351 359 genes were up-regulated (**Table S4**). In the KEGG pathway ‘MAPK signaling’, 55  
352 differentially expressed genes were involved, with 42 genes down-regulated and 13 genes  
353 up-regulated. These results clearly show a large number of genes whose expression was  
354 altered—mostly down-regulated—by the reduced expression of *AFF* in the *aff* tomato fruit line;  
355 these suppressed pathways may then prevent the locule tissues from liquefying. Furthermore, we  
356 performed detailed comparisons between pair-wise transcriptome datasets. When comparing gene  
357 expressions between locule and placenta tissues of the WT tomato (group 1), we found that genes  
358 involved in the GO terms lipid transport, apoplast, flavonoid metabolism, transferase, and  
359 hydrolase activity or KEGG pathways such as metabolism, protein kinase, and phyto-hormone  
360 were enriched (**Fig. S4**). However, the GO terms lipid transport and flavonoid metabolism were  
361 not enriched in differentially expressed genes between the locule and placenta tissues of the *aff*  
362 tomato lines (group 2). Additionally, there was over-representation of the GO terms phloem or  
363 xylem, as well as symporter activity or transmembrane transmission-related genes that were  
364 differentially expressed in group 2 (**Fig. S5**). To focus on the differences between the locule  
365 tissues from the WT and *aff* tomato lines (group 3), we further compared their differentially  
366 expressed genes and found that similar GO terms or KEGG pathways as those observed in group 1

367 were enriched (**Fig. 7a-b**). Further, the GO terms DNA replication, plasma membrane,  
368 photosystem II, plant-type cell wall, glucosyltransferase activity, as well as nutrient reservoir  
369 activity were specifically enriched in group 3 (**Table S6** and **Fig. 7a**). Additionally, we also  
370 compared the gene expression difference between the placenta issues from the WT and *aff* tomato  
371 lines (group 4). However, the aforementioned KEGG pathways or GO terms were not enriched or  
372 differentially expressed in group 4 (**Fig. S6**). These results together suggest that the reduced  
373 expression of *AFF* mainly down-regulated the expression of genes involved in DNA replication,  
374 phyto-hormone metabolism, photosynthesis, sugar metabolism, and MAPK signaling, which  
375 further prevented the locule liquefaction process that normally occurred during the differentiation  
376 of locule tissue in the placenta of WT tomato fruits.

377

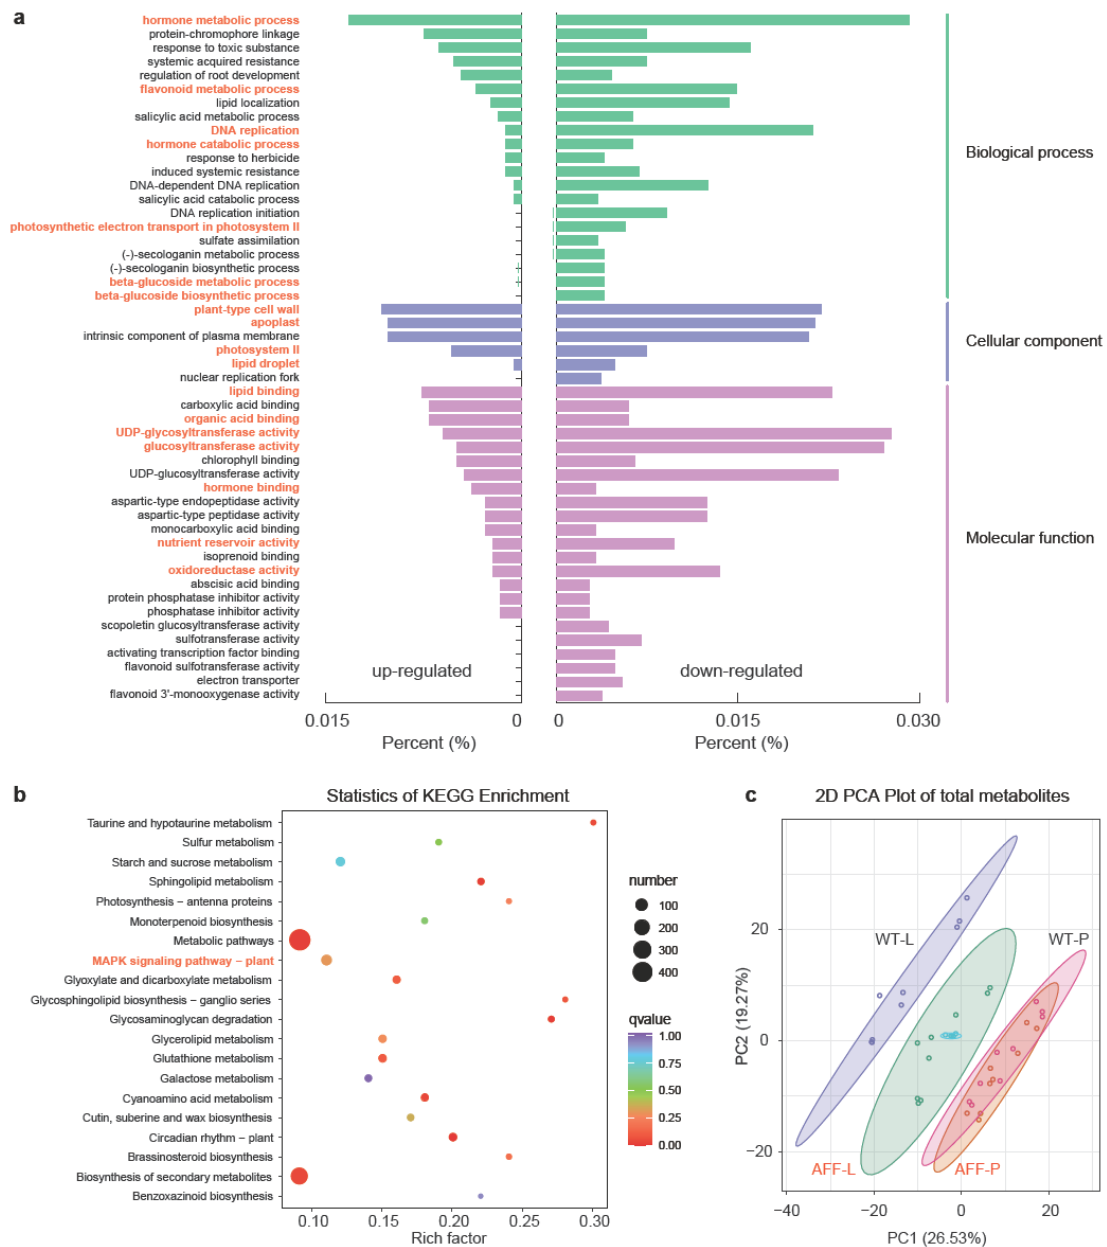

378

379 **Figure 7. The Differential Gene Expression and Metabolite Contents between Fruits from**  
 380 **the All-Flesh and WT Tomatoes.** The significantly enriched GO terms (a) and KEGG pathways  
 381 (b) of differentially expressed genes between locule tissues from the all-flesh fruit and WT  
 382 tomatoes. (c) The principal component analysis of metabolites from the locule and placenta of WT  
 383 and all-flesh fruit tomatoes. WT-L: locule tissue of WT tomatoes; WT-P: placenta tissue of WT  
 384 tomatoes; AFF-L: locule tissue of all-flesh fruit tomatoes; AFF-P: placenta tissue of all-flesh fruit  
 385 tomatoes.

386

387 Genes that have key functions in the liquefaction of locule tissues showed strong  
388 expression differentiation between the locule tissues of the *aff* and WT tomato fruits. Genes  
389 involved in hydrolases, phyto-hormone metabolism, and DNA replication, were reported to be  
390 involved in the regulation of locule tissue liquefaction of tomato fruits (Christian et al., 2014;  
391 Huber and Lee, 1986; Mounet et al., 2009; Takizawa et al., 2014; Uluisik et al., 2016). We  
392 examined the differentially expressed genes between tissues from the WT and the *aff* line. Among  
393 the 188 genes that showed stable and strong differential expression, 122 genes were  
394 down-regulated, while 66 genes were up-regulated in *aff* tomatoes in comparison to the WT  
395 (**Table S7**). Many of these differentially expressed genes are locule tissue liquefaction  
396 process-related genes. First, six gibberellin-related genes were down-regulated in *aff* tomato fruit.  
397 Among them, four are gibberellin-regulated proteins, while one is involved in the gibberellin  
398 biosynthesis process, and the last one is involved in the gibberellic acid-mediated signaling  
399 pathway (**Table S7**). We also found six auxin-related genes that were differentially expressed,  
400 with the auxin repressed protein up-regulated, while the other five genes, auxin transporters, auxin  
401 responsive protein IAA9, auxin-related genes from the GH3 gene family and those involved in the  
402 auxin signaling pathway, were down-regulated in *aff* tomato. These phyto-hormone-related genes  
403 should play key roles in the liquefaction of locule tissue in WT tomato. Second, there were three  
404 copies of cytochrome P450 genes whose expressions were down-regulated in *aff* tomato fruits  
405 (**Table S6**), indicating a low level of energy-related activity in *aff* fruit tomato. Third,  
406 pectinesterase (PE) that is strictly regulated and functions in the softening of tomato fruits was  
407 largely down-regulated in *aff* tomatoes. This may have an important impact on the solidness of *aff*  
408 tomato fruits. Fourth, we identified two copies of xyloglucan endo-transglycosylase (XET)-related  
409 genes that were down-regulated in *aff* tomatoes. XET is involved in the induction of fruit ripen  
410 and softening, its down-regulation should hinder the softening of *aff* tomato fruits. Fifth, we found  
411 three copies of glycosyl hydrolase genes that were down-regulated in *aff* tomato fruit, indicating  
412 suppressed metabolism of glycolysis in *aff* tomato compared with the WT tomato. Interestingly,  
413 the gene *PAR2* (*Solyc01g008550*), which encodes phenylacetaldehyde reductase, was up-regulated  
414 in the locule tissue of *aff* fruit tomato compared with the WT tomato (2.50-, 1.87-, and 6.59-fold  
415 changes at 10, 15, and 25 DAF, respectively). Phenylacetaldehyde reductase has been reported as

416 the key gene catalyzing the synthesis of the aroma volatile 2-phenylethanol in tomato; its  
417 up-regulated expression in the locule makes *aff* tomato more specific in flavor quality relative to  
418 WT tomato (Tieman et al., 2006), thus endowing the *aff* tomato with a flavor advantage for the  
419 food processing industry (Macua et al., 2015). Moreover, we found that *TOMATO AGAMOUS 1*  
420 (*TAG1*, *Solyc02g071730*) and *TAGL1* (*Solyc07g055920*)—both are paralogs of *AFF* and show  
421 high levels of sequence homology (**Fig. S7**)—were up-regulated in the locule tissue of *aff* tomato  
422 compared with the WT tomato, which may suggest that the feedback compensation expression of  
423 *TAG1* and *TAGL1* under down-regulated expression of *AFF*. Additionally, *TOMATO AGAMOUS*  
424 *LIKE 11* (*TAGL11*, *Solyc11g028020*), the paralog with the highest homology to *AFF* in tomato  
425 (Huang et al., 2017; Zhang et al., 2019) (**Fig. S7**), showed no expression difference between *aff*  
426 and WT tomatoes; thus, *TAGL11* may not be one member of the feedback compensation loop  
427 shared by *TAG1*, *TAGL1*, and *AFF*. However, the fact that the up-regulated expression of *TAG1*  
428 and *TAGL1*, as well as the stable expression of *TAGL11*, did not compensate the low dosage of  
429 *AFF* to recover from the all-flesh fruit trait suggested that the mediation of locule tissue  
430 liquefaction is unique to the *AFF* gene and not to its three paralogs *TAG1*, *TAGL*, and *TAGL11*.  
431 These tomato fruit development-related genes—whose expressions were largely altered as a  
432 subsequent effect of the reduced expression of *AFF*—are the key genes that suppressed the locule  
433 tissue liquefaction in *aff* tomatoes.

434 Our metabolic data support the results observed in the mRNA-seq analysis. We measured the  
435 metabolites and their quantities in tomato fruits of the WT and *aff* line (**Methods**). Principal  
436 component analysis (PCA) of metabolites from the WT and *aff* line (**Fig. 7c**) showed that the  
437 placenta tissues from the *aff* and WT tomato lines had similar metabolic components. However,  
438 the metabolites of locule tissue were different from those of the placenta tissue in the WT or *aff*  
439 tomato. More importantly, the pattern of locule metabolites in the *aff* tomato was located in  
440 between that of the placenta and locule tissues of the WT tomato. This indicates that the  
441 down-regulated expression of *AFF* changed the metabolic components in the locule tissue of *aff*  
442 tomato. Furthermore, we investigated the metabolites whose contents were changed in the *aff*  
443 tomato compared to those in the WT tomato and found higher levels of flavonoids and lipids  
444 (**Table S8**) in the *aff* tomato, whereas there were more alkaloids and phenolic acids (**Table S8**) in

445 the WT tomato than in the *aff* tomato. The differences in the metabolic components were caused  
446 by the down-regulated expression of *AFF* and downstream large-scale gene expression variations,  
447 which further resulted in the distinct fruit quality, as taste and flavor, of the *aff* tomato, compared  
448 to the WT tomato.

## 449 **DISCUSSION**

450 Locule gel liquefaction is not only a significant process in development and ripening but also a  
451 typical characteristic of tomato fruit. In this study, the causal gene *AFF* of the all-flesh fruit trait  
452 and the 416-bp key deletion mutation in the cis-regulatory region of *AFF* were determined, and  
453 we further found that the liquefaction function of locule tissue is mediated uniquely by *AFF*,  
454 while the expression dosage of *AFF* is crucial for locule tissue liquefaction. *AFF* belongs to the  
455 AGAMOUS gene family and contains typical MADs-box domain; its paralogous genes in tomato  
456 are *TAG1*, *TAGL1*, and *TAGL11*, which have a high sequence homology (**Fig. S7**). These genes  
457 and their orthologs were found to play important roles in ovule differentiation and formation,  
458 participate in seed and coat development, or regulate the expansion and ripening processes of the  
459 carpel and fleshy fruit in many species (Angenent et al., 1995; Colombo et al., 1995; Itkin et al.,  
460 2010; Pan et al., 2010; Favaro et al., 2003; Huang et al., 2017; Ocarez and Mejía, 2016; Vrebalov  
461 et al., 2009). Recently, using reverse genetics, Zhang et al. (2019) showed that *AFF* (*slmbp3*) had  
462 impacts on locule tissue liquefaction and seed formation in tomato, while the seeds from RNAi  
463 plants lost germinability. However, in our *aff* genotype, the 416-bp deletion down-regulated the  
464 expression of *AFF*, inhibiting locule gel formation but producing normal seeds.

465 The *AFF* gene functions as a core node of locule liquefaction whose function cannot be  
466 compensated by its paralogs *TAG1*, *TAGL1*, or *TAGL11*. The cis-regulatory sequence deletion  
467 mutation of the *AFF* gene caused the differential expression of many important genes. Among  
468 them, we observed that the expressions of *TAG1* and *TAGL1* were significantly up-regulated in *aff*  
469 tomato, accompanied by the down-regulated expression of *AFF*. Another paralog, *TAGL11* (**Fig.**  
470 **S7**), which is involved in fleshy tissue differentiation of tomato (Huang et al., 2017), showed  
471 stable expression between *aff* and WT tomatoes. This suggests that *AFF*, *TAG1*, and *TAGL1* may  
472 share one expression-feedback loop, without *TAGL11*. More importantly, considering the fact that

473 the up-regulated expression of *TAG1* and *TAGL1* and the stable expression of *TAGL11* did not  
474 recover the normal liquefied locule tissue from the all-flesh fruit tomato, the function of mediating  
475 locule tissue liquefaction should be unique to the gene *AFF*, but not its paralogs, i.e., the other  
476 D-class genes in tomato (**Fig. S7**). Furthermore, based on metabolomics analysis, we found that  
477 the pattern of locule metabolites in the *aff* tomato was located in between that of the placenta and  
478 locule tissues of the WT tomato, which indicates that tomato locule tissue is derived from the  
479 placenta, which is formed from the development of the carpel (Davies and Cocking, 1965;  
480 Lemaire-Chamley et al., 2005; Pedro et al., 1991; Sicard et al., 2010). The process is regulated by  
481 D-class genes in the classical ‘ABCDE’ flower development model and is consistent with the  
482 locule gel formats along with the degradation of the cell wall matrix (Brecht, 1987; Chevalier et  
483 al., 2011; Joubès et al., 1999; Lemaire-Chamley et al., 2005).

484 The reduced dosage of the *AFF* protein caused by a 416-bp cis-regulatory deletion is the key  
485 factor that promoted the formation of the all-flesh fruit trait. The dosage of gene expression has  
486 been proved to play an important role in the variation of plant traits, especially for the floral organ  
487 identity that determines genes. Up- or down-regulation of the expression of one ABCDE-class  
488 gene may easily shift the boundaries between different types of floral organs (Ito et al., 2007;  
489 Wang et al., 2016; Wuest et al., 2012). For example, a dosage imbalance between B- and C-class  
490 proteins can change stamen morphology (Liu et al., 2018), while the expression variation of  
491 *TAGL1* and *TAGL11* can also affect the development of tomato seeds and the fleshy characteristic  
492 (Gimenez et al., 2016; Huang et al., 2017; Ocarez and Mejía, 2016; Vrebalov et al., 2009).  
493 Besides floral-determining genes, another example shows that gene editing of different loci in the  
494 promoter region of tomato genes resulted in fruits with different sizes (Rodriguez-Leal et al.,  
495 2017). The structural variant (SV) has been found as one major genetic resource to employ gene  
496 expression dosage variations (Alonge et al., 2020). SV includes large sequence  
497 deletions/insertions, inversions, duplications, and chromosomal rearrangement. Different from  
498 SNPs, these gene-associated SVs located in cis-regulatory regions always cause expression dosage  
499 changes of corresponding genes and further produce genetic and phenotypic changes. SV was  
500 recently reported to be involved in the formation of many traits in plants and is believed to play an  
501 important role in plant evolution, crop domestication and improvement (Alonge et al., 2020; Li et

502 al., 2018; Lye and Purugganan, 2019; Rodriguez-Leal et al., 2017). In our study, a 416-bp  
503 sequence deletion—a type of SV—that lies in the cis-regulatory region of *AFF* down-regulated  
504 the expression of *AFF* and led to its dosage effect as the all-flesh fruit trait (**Fig. 5 and 6**). As  
505 exemplified in this study, SVs present as useful quantitative variants, which might be used in  
506 next-generation breeding strategy through genetic engineering in the future (Alonge et al., 2020;  
507 Rodriguez-Leal et al., 2017; Swinnen et al., 2016).

508 The expression variation of *AFF* may also contribute to the fleshy fruit evolution in  
509 Solanaceae and provides insights into the fruit type evolution among plants. It was proved by  
510 archaeology and molecular biology that fleshy fruit plants evolved from dry fruit plants, but the  
511 molecular mechanisms responsible for the shift from dry plants to fleshy fruit plants remain  
512 unknown (Kumar and Khurana, 2014; Maheepala et al., 2019; Seymour et al., 2008). Therefore,  
513 revealing the genetic basis and mechanism underlying the alteration process between fruit types is  
514 critical for understanding the evolution of biodiversity. However, the lack of intermediate or  
515 transition fruit types has limited the research progress (Annette et al., 2011; Wang et al., 2015).  
516 Comparative genetic analysis has shown that there are widespread genomic synteny and  
517 collinearity of genes among *Solanaceae* species, especially in *Solanaceae* vegetable crops (potato,  
518 tomato, capsicum, and eggplant), whose fruits show many similar characteristics. However,  
519 eggplant and capsicum do not have the same jelly-like tissue in their locule as that of tomato.  
520 Those differences in fruit development could also be caused by gene expression variations, other  
521 than functional variations of genes (Kim et al., 2014). For example, there is more locule gel in the  
522 wild tomatoes *S. lycopersicum* var. *cerasiforme* and *S. pimpinellifolium* than in cultivated  
523 tomatoes (Lemaire-Chamley et al., 2005). We found that the expression of the *AFF* gene in wild  
524 tomatoes is also higher than that in cultivated tomato (Tomato Genome Consortium, 2012). The  
525 example suggests a positive relationship between the quantity of liquefied locule tissues and the  
526 expression level of the *AFF* gene through the process of tomato domestication and breeding.

527 To summarize, the all-flesh fruit tomato whose locule tissue changes from a jelly-like  
528 substance to a solid-state cavity, was found to be caused by an SV of a 416-bp sequence deletion  
529 in the cis-regulatory region of the *AFF* gene. The SV mutation reduced the expression dosage of  
530 *AFF*, which further impacted the normal liquefaction process of locule tissue through the altered



531 expression of subsequent key genes and the subsequent changes in the metabolic components of  
532 tomato. Our findings are valuable for revealing the mechanism that underlies changes inside  
533 tomato fruit and also shed new light onto the evolution of berry fruit plants. In the future, with  
534 systematic studies on the dosage effects of *AFF* expression, accompanied by comparative genomic  
535 analysis between plant species of different fruit types and extensive research on the formation and  
536 development processes of fruit locule tissues, the evolutionary mechanism of nightshade family  
537 fruits and even the berry fruits of different plants will be revealed in depth.

538

539

## 540 **MATERIALS AND METHODS**

### 541 **Plant Materials, Growth Conditions, and Phenotyping**

542 Tomato (*S. lycopersicum*) plants were cultivated at the Institute of Vegetables and Flowers,  
543 Chinese Academy of Agricultural Sciences (IVF-CAAS), Beijing, China, during the natural  
544 growing season and under greenhouse conditions. Seeds of *S. lycopersicum* cv. 06-790 and  
545 09-1225 (all-flesh cultivar) were from our own stocks. Seeds of *S. lycopersicum* cv. LA4069,  
546 H1706 (LA4345, Heinz 1706-BG; this line was used for the tomato genome sequencing project)  
547 and Mico-tom (LA3911) were obtained from the Charles M. Rick Tomato Genetics Resource  
548 Center (TGRC) at the University of California, Davis.

549 The all-flesh line 06-790 was crossed with the wild type, LA4069, to generate F<sub>1</sub> progeny,  
550 and F<sub>2</sub> progeny were derived from self-pollination of the F<sub>1</sub> progeny. The F<sub>1</sub> progeny were crossed  
551 with 06-790 to generate BC<sub>1</sub>P1 progeny and crossed with LA4069 to generate BC<sub>1</sub>P2 progeny.  
552 These six populations of two crosses were grown for genetic analysis in the greenhouse in spring  
553 2015.

554 The BC<sub>2</sub>S<sub>1</sub> progeny were developed from the all-flesh line 06-790 as donor parents, with  
555 continued backcrossing to H1706. When the fruit was ripe, the phenotype and characteristics of  
556 locule tissue were investigated (10 fruits per plant). The all-flesh fruit individuals of BA-130 and  
557 BA-150 and the WT individuals of BA-124 and BA-128 were selected for qPCR.

558 The NILs of *aff* were derived from BC<sub>6</sub>S<sub>2</sub> plants generated by 06-790 continual backcrossing  
559 to H1706. Among the NILs, BA-1 and BA-2 are *aff* lines and BA-4 and BA-6 are normal lines,  
560 and these were used for seed germination. BA-1 and H1706 were also used for morphology  
561 research as well as transcriptome and metabolome profiling. Data were analyzed with Excel  
562 2010 .

### 563 **Paraffin Sectioning and Transmission Electron Microscopy**

564 The locule tissue was cut into 1 mm×2 mm cuboids and fixed in FAA (5% acetic acid, 5%  
565 formaldehyde, 50% ethanol, 5% glycerin mixture) for 24 h at room temperature. After  
566 dehydration, embedding, slicing, and pretreatment, sections were dyed using safranin and fast

567 green double dye. The paraffin sections were visualized and photographed with and OLYMPUS  
568 IX71 microscope.

### 569 **Genome Sequencing, SNP, and SV Calling**

570 For rapid identification of the mutation conferring all-flesh fruit in 06-790, we used MutMap, a  
571 method based on whole-genome resequencing of bulked DNA of F<sub>2</sub> segregants (Takagi et al.,  
572 2013). We designed two mixed DNA pools that combined the 30 F<sub>2</sub> progeny that had the all-flesh  
573 phenotype and normal phenotype. The DNA pools were subjected to whole-genome resequencing  
574 using an Illumina GAIIx DNA sequencer at Beijing Berry Genomics Co., Ltd. The sequencing  
575 depth was approximately 20-fold coverage for the two parental lines and approximately 30-fold  
576 coverage for the two mixed DNA pools. The paired-end reads of 06-790, LA4069, and the mixed  
577 DNA pools were mapped to the tomato reference genome (SL4.0 build; Tomato Genome  
578 Consortium, 2012) using Burrows-Wheeler Aligner version 0.7.10- r789 with default parameters  
579 (Li and Durbin, 2009).

### 580 **Promoter sequence conservation of *AFF* orthologous genes**

581 Syntenic orthologous genes of *AFF* among Solanaceae crop species, *S. lycopersicum*, *S. pennellii*,  
582 *S. tuberosum*, *S. melongena*, and *C. annuum*, were determined by the SynOrths tool (Cheng et al.,  
583 2012); they are *Sopen06g023350*, *Sotub06g020180*, *Sme2.5\_02049.1\_g00007.1*, and  
584 *Capang01g002169*. Then, 5-kb upstream sequences (promoter region) of each of the five  
585 orthologous genes were extracted from the genomes of the five species. These sequences were  
586 further aligned by MUSCLE (Edgar, 2004). Aligned sequences were further submitted to calculate  
587 the conservation level of each aligned nucleotide and then averaged by a 50-bp sliding window  
588 with a step of 10 bp. The average values are plotted in **Figure 4a** to show the conservation level of  
589 the local regions of the promoter sequences among *Solanaceae* crop genomes.

590 We further investigated the sequence conservation of the *AFF* gene in the tomato population  
591 using the published variome datasets of 360 tomato samples (Lin et al., 2014). We calculated the  $\pi$   
592 values for the 5'UTR, gene body, and 3'UTR for all 35,768 tomato genes in the genome of *S.*  
593 *lycopersicum* with the variome datasets. The distributions of the  $\pi$  values in the three regions  
594 (5'UTR, gene body, and 3'UTR) were further plotted as bean-plots with the R package. The

595 locations of the  $\pi$  values of the *AFF* gene were then clearly observed in the background of all  
596 tomato genes (**Figure 4b**).

### 597 **RNA Extraction and Quantitative Polymerase Chain Reaction (qPCR)**

598 With the use of specific primers and probes, different tomato lines were detected by real-time  
599 PCR. They included all-flesh tomato lines BA-130, BA-150, 06-790, and 09-1225, normal tomato  
600 lines BA-124, BA-128, LA4069 and H1706, and F<sub>1</sub> progeny from the crossing of 06-790 and  
601 H1706. They were grown in the greenhouse in autumn 2017, and RNA was collected from locule  
602 tissues at 7 DAF, 10 DAF, 15 DAF and 25 DAF. The internal reference gene was *SIFRG27* in  
603 tomato, the locus was *Solyc06g007510*, and the primer sequence was F (5'-3'):  
604 CTCTCTGTTGACAGACCCA; R (5'-3'): GAGTCCAGCTACGAGCAGTG (Cheng et al., 2017).  
605 The primer sequence of *AFF* was F (5'-3'): GCATCTGGTTGGTGAAGG; R (5'-3'):  
606 ATCTGATTCTGCTGATGCC. The primers were designed by Roche LCPDS2 software and were  
607 synthesized by Beijing TsingKe Biological Technology Co., Ltd. cDNA was obtained from total  
608 RNA by using Prime script RT, the reverse transcription kit of Takara Bio Inc. The qRT-PCR was  
609 completed on an ABI Prism®7900 qRT-PCR operating system of Applied Biosystems, according  
610 to the instructions of the SYBR Prime Script RT-PCR kit. The qRT-PCR and 2<sup>- $\Delta\Delta C_t$</sup>  method were  
611 used to analyze the expression of the selected gene.

### 612 **Relative Activity of Luciferase**

613 To confirm the function of the 416-bp deletion in promoting the expression of associated gene,  
614 the dual luciferase reporter gene assay was used to check the expression difference. Based on the  
615 PAS (PCR-based accurate synthesis) method, full-length splicing primers were designed, and the  
616 protective base synthesis gene promoters (Del and WT), designed at both ends of the primers,  
617 were inserted in sites between PvuII and KpnI in plasmid pGreenII 0800-luc. The recombinant  
618 plasmid pGreenII 0800-luc-promoter (Del) was transferred into the epi400 clone strain, and the  
619 recombinant plasmid pGreenII 0800-luc-promoter (WT) was transferred to the Top10 clone strain.  
620 The sequence of the recombinant plasmid was verified by the sequence of the positive clones.

621 Monoclones were selected for PCR verification after plasmid transformation. *Nicotiana*  
622 *benthamiana* leaves (one month old) were transiently infected by positive strains using an

623 Agrobacterium-mediated method. Each group was set with three replicates. The activity of the  
624 dual luciferase reporter gene was detected after three days. The transcriptional regulation was  
625 determined by the activity ratio of firefly luciferase and Ranilla luciferase, that is, the relative  
626 activity of luciferase.

### 627 **Transcriptome and Metabolome Profiling**

628 Metabolome profiling was carried out using a widely targeted metabolome method by Wuhan  
629 Metware Biotechnology Co., Ltd. (Wuhan, China) (<http://www.metware.cn/>). Briefly, the tomato  
630 tissues were lyophilized and ground into fine powder using a mixer mill (MM 400, Retsch) with a  
631 zirconia bead for 1.5 min at 30 Hz. Then, 100 mg tissue powder was weighed and extracted  
632 overnight with 1.0 mL 70% aqueous methanol at 4 °C, followed by centrifugation for 10 min at  
633 10,000 g. All supernatants were collected and filtered with a membrane (SCAA-104, 0.22 mm pore  
634 size; ANPEL, Shanghai, China, <http://www.anpel.com.cn/>) before LC-MS analysis. Quantification  
635 of metabolites was carried out using a scheduled multiple reaction monitoring method (Wei et al.,  
636 2013; Zhu et al., 2018). In the data analysis process, unsupervised PCA (principal component  
637 analysis) was performed by function pcomp within R (version 3.5.0, [www.r-project.org](http://www.r-project.org)). The  
638 data were unit variance scaled before performing unsupervised PCA. The HCA (hierarchical  
639 cluster analysis) results of samples and metabolites were presented as heatmaps with dendrograms,  
640 while Pearson correlation coefficients (PCC) between samples were calculated by the cor function  
641 in R. Both HCA and PCC were carried out by R package pheatmap (version 1.0.12). Identified  
642 metabolites were annotated using KEGG compound database  
643 (<http://www.kegg.jp/kegg/compound/>); annotated metabolites were then mapped to the KEGG  
644 pathway database (<http://www.kegg.jp/kegg/pathway.html>). Pathways with significantly regulated  
645 metabolites were then fed into MSEA (metabolite set enrichment analysis).

646 For the RNA-seq experiments, a total amount of 3 µg RNA per sample was used as input  
647 material for the RNA sample preparations. Sequencing libraries were generated using the  
648 NEBNext® Ultra™ RNA Library Prep Kit for Illumina® (NEB, USA) following the  
649 manufacturer's recommendations, and index codes were added to attribute sequences to each  
650 sample. The constructed libraries were then sequenced on an Illumina Hiseq platform, and 125

651 bp/150 bp paired-end reads were generated. Transcriptome profiling was performed as described  
652 previously (Ying et al., 2020). Briefly, clean reads were obtained using a Hiseq-X-ten sequencing  
653 platform, mapped to the tomato reference genome (Version 4.0) using Hisat 2 (Daehwan et al.,  
654 2015), and then normalized to TPM (tags per million reads) reads by StringTie (Pertea et al., 2015).

655 Samples under different combinations were analyzed by MeV (Version 4.9) with the *k*-means  
656 method (Gasch and Eisen, 2002). The normalized expression values of genes and metabolites were  
657 calculated by dividing their expression level at different time points/tissues. Hierarchical clustering  
658 (HCL) and principal component analysis (PCA) were performed to facilitate graphical  
659 interpretation of relatedness among different time points/tissue samples. The transformed and  
660 normalized gene and metabolite expression values with z-scores were used for HCL and PCA. We  
661 used the Pearson's correlation algorithm method (Bishara and Hittner, 2012) to construct a  
662 transcription factor-related gene and metabolite regulatory network. Mutual information was used  
663 for calculating the expression similarity between the expression levels of transcription factors and  
664 genes, and metabolite pairs were calculated by R software. All the associations among transcription  
665 factors, genes, and metabolites were analyzed by Cytoscape software (Kohl et al., 2011).

666

### 667 **Funding Information**

668 This work was supported by The National Key Research and Development Program of China  
669 (2016YFD0100204), the Fundamental Research Funds for Central Non-profit Scientific  
670 Institution (IVF-BRF2018006), the Key Laboratory of Biology and Genetic Improvement of  
671 Horticultural Crops, Ministry of Agriculture, China, and the Science and Technology Innovation  
672 Program of the Chinese Academy of Agricultural Sciences (Grant No. CAAS-ASTIPIVFCAS).

### 673 **Author Contributions**

674 J.L. and L.L. designed and organized the study. L.L., J.B., J.L., X.L., J.H., C.P., S.H., J.Y., and M.Z.  
675 conducted the research. F.C., K.Z., L.L., and Y.Z. analyzed the data. All authors discussed and  
676 interpreted the results. L.L., F.C., and J.L. wrote the paper. L.L. agrees to serve as the author  
677 responsible for contact and ensures communication.

678 **Acknowledgements**

679 We thank Zhenxian Zhang and Wencai Yang (both China Agricultural University), and  
680 Jianchang Gao, Zhognhua Zhang and Xiaowu Wang (all Institute of Vegetables and Flowers,  
681 Chinese Academy of Agricultural Sciences) for critical comments.

682 **Competing Interests**

683 The authors declare no competing financial interest.

684

685

686 **References**

- 687 **Alonge, M., Wang, X.G., Benoit, M., Soyk, S., Pereira, L., Zhang, L., Suresh, H., Ramakrishnan, S.,**  
688 **Maumus, F., and Ciren, D., et al.** (2020). Major impacts of widespread structural variation on  
689 gene expression and crop improvement in tomato. *Cell* 182:1-47.
- 690 **Angenent, G.C., Franken, J., Busscher, M., van Dijken, A., van Went, J.L., Dons, H.J., and van**  
691 **Tunen, A.J.** (1995). A novel class of MADS box genes is involved in ovule development in petunia.  
692 *The Plant Cell* 10:1569-1582.
- 693 **Atherton, J.G., and Rudich, J.** (1986) *The tomato crop: A scientific basis for improvement*. London:  
694 Chapman and Hall.
- 695 **Bapat, V.A., Trivedi, P.K., Ghosh, A., Sane, V.A., Ganapathi, T.R., and Nath, P.** (2010). Ripening of  
696 fleshy fruit: Molecular insight and the role of ethylene. *Biotechnol Adv* 28:94-107.
- 697 **Bishara, A.J., and Hittner, J.B.** (2012). Testing the significance of a correlation with nonnormal data:  
698 Comparison of Pearson, Spearman, transformation, and resampling approaches. *Psychol Methods*  
699 17:399-417.
- 700 **Brecht, J.K.** (1987). Locular gel formation in developing tomato fruit and the initiation of ethylene  
701 production. *Hortscience* 22:476-479.
- 702 **Cheng, F., Wu, J., Fang, L., and Wang, X.** (2012). Syntenic gene analysis between *Brassica rapa* and  
703 other Brassicaceae species. *Frontiers in Plant Science* 3:198.
- 704 **Cheng, G.W., and Huber, D.J.** (1996). Alterations in structural polysaccharides during liquefaction of  
705 tomato locule tissue. *Plant Physiol* 111:447-457.
- 706 **Cheng, G.W., and Huber, D.J.** (1997). Carbohydrate solubilization of tomato locule tissue cell walls:  
707 Parallels with locule tissue liquefaction during ripening. *Physiol Plantarum* 101:51-58.
- 708 **Cheng, Y., Bian, W.Y., Pang, X., Yu, J.H., Ahammed, G.J., Zhou, G.Z., Wang, R.Q., Ruan, M.Y., Li,**  
709 **Z.M., and Ye, Q.J., et al.** (2017). Genome-Wide identification and evaluation of reference genes  
710 for quantitative RT-PCR analysis during tomato fruit development. *Frontiers in Plant Science* 29:1440.
- 711 **Christian, C., Matthieu, B., Julien, P., Catherine, C., Frédéric, G., and Nathalie, F.** (2014).  
712 Endoreduplication and fruit growth in tomato: Evidence in favour of the karyoplasmic ratio theory.  
713 *J Exp Bot* 65:2731-2746.
- 714 **Colombo, L., Franken, J., Koetje, E., Went, V.J., Dons, H.J.M., Angenent, G.C., and Tunen, V.A.J.**  
715 (1995). The petunia MADS box gene *FBP11* determines ovule identity. *The Plant Cell*  
716 7:1859-1868.
- 717 **Czerednik, A., Busscher, M., Angenent, G.C., and De Maagd, R.A.** (2015). The cell size distribution  
718 of tomato fruit can be changed by overexpression of *CDKAI*. *Plant Biotechnol J* 13:259-268.
- 719 **Daehwan, K., Ben, L., and Salzberg, S.L.** (2015). HISAT: A fast spliced aligner with low memory  
720 requirements. *Nat Methods* 12:357-360.
- 721 **Davies, J.W., and Cocking, E.C.** (1965). Changes in carbohydrates, proteins and nucleic acids during



- 722 cellular development in tomato fruit locule tissue. *Planta* 67:242-253.
- 723 **Dreni, L., and Kater, M.M.** (2014). MADS reloaded: Evolution of the AGAMOUS subfamily genes.  
724 *New Phytol* 201:717-732.
- 725 **Edgar, R.C.** (2004). MUSCLE: Multiple sequence alignment with high accuracy and high throughput.  
726 *Nucleic Acids Res* 32:1792-1797.
- 727 **Ezquer, I., Mizzotti, C., Nguemaona, E., Gotté M., Beauzamy, L., Viana, V.E., Dubrulle, N.,  
728 Oliveira, A.C.D., Caporali, E., and Koroney, A.S.** (2016). The developmental regulator  
729 *SEEDSTICK* controls structural and mechanical properties of the Arabidopsis seed coat. *THE  
730 PLANT CELL ONLINE* 28:2478-2492.
- 731 **Favaro, R., Pinyopich, A., Battaglia, R., Kooiker, M., Borghi, L., Ditta, G., Yanofsky, M.F., Kater,  
732 M.M., and Colombo, L.** (2003). MADS-Box protein complexes control carpel and ovule  
733 development in *Arabidopsis*. *The Plant cell* 15:2603-2611.
- 734 **Fernandez-Pozo, N., Zheng, Y., Snyder, S.I., Nicolas, P., Shinozaki, Y., Fei, Z., Catala, C.,  
735 Giovannoni, J.J., Rose, J.K.C., and Mueller, L.A.** (2017). The tomato expression atlas.  
736 *Bioinformatics* 33:2397-2398.
- 737 **Gasch, A.P., and Eisen, M.B.** (2002). Exploring the conditional coregulation of yeast gene expression  
738 through fuzzy k-means clustering. *Genome Biol* 3:H59.
- 739 **Gillaspy, G., Ben-David, H., and Gruissem, W.** (1993). Fruits: A developmental perspective. *THE  
740 PLANT CELL ONLINE* 5:1439-1451.
- 741 **Gimenez, E., Castañeda, L., Pineda, B., Pan, I.L., Moreno, V., Angosto, T., and Lozano, R.** (2016).  
742 *TOMATO AGAMOUS1* and *ARLEQUIN/TOMATO AGAMOUS-LIKE1* MADS-box genes have  
743 redundant and divergent functions required for tomato reproductive development. *Plant Mol Biol*  
744 91:513-531.
- 745 **Huang, B., Routaboul, J.M., Liu, M., Deng, W., Maza, E., Mila, I., Hu, G., Zouine, M., Frasse, P.,  
746 and Vrebalov, J.T., et al.** (2017). Overexpression of the class D MADS-box gene *Sl-AGL11*  
747 impacts fleshy tissue differentiation and structure in tomato fruits. *J Exp Bot* 68:4869-4884.
- 748 **Huang, Z., Shi, T., Zheng, B., Yumul, R.E., Liu, X., You, C., Gao, Z., Xiao, L., and Chen, X.** (2017).  
749 *APETALA2* antagonizes the transcriptional activity of AGAMOUS in regulating floral stem cells in  
750 *Arabidopsis thaliana*. *New Phytol* 215:1197-1209.
- 751 **Huber, D.J., and Lee, J.H.** (1986). Comparative analysis of pectins from pericarp and locular gel in  
752 developing tomato fruit. *Acs Symposium Series*.310:141-156.
- 753 **Itkin, M., Seybold, H., Breitel, D., Rogachev, I., and Aharoni, A.** (2010). *TOMATO AGAMOUS-LIKE  
754 I* is a component of the fruit ripening regulatory network. *Plant J* 60:1081-1095.
- 755 **Ito, T., Ng, K.H., Lim, T.S., and Meyerowitz, Y.E.M.** (2007). The homeotic protein AGAMOUS  
756 controls late stamen development by regulating a jasmonate biosynthetic gene in *Arabidopsis*. *Plant  
757 Cell* 19:3516-3529.

- 758 **Joubès, J., Phan, T., Just, D., Rothan, C., Bergounioux, C., Raymond, P., and Chevalier, C.** (1999).  
759 Molecular and biochemical characterization of the involvement of Cyclin-Dependent kinase a  
760 during the early development of tomato fruit. *Plant Physiol* 121:857-869.
- 761 **Kim, S., Park, M., Yeom, S.I., Kim, Y.M., Lee, J.M., Lee, H.A., Seo, E., Choi, J., Cheong, K., and**  
762 **Kim, K.T., et al.** (2014). Genome sequence of the hot pepper provides insights into the evolution of  
763 pungency in *Capsicum* species. *Nature Genetics* 46:270-278.
- 764 **Koenig, D., Jimenez-Gomez, J.M., Kimura, S., Fulop, D., Chitwood, D.H., Headland, L.R., Kumar,**  
765 **R., Covington, M.F., Devisetty, U.K., and Tat, A.V., et al.** (2013). Comparative transcriptomics  
766 reveals patterns of selection in domesticated and wild tomato. *Proceedings of the National*  
767 *Academy of Sciences* 110:E2655-E2662.
- 768 **Kohl, M., Wiese, S., and Warscheid, B.** (2011). Cytoscape: Software for visualization and analysis of  
769 biological networks. *Methods in molecular biology* (Clifton, N.J.) 696:291-303.
- 770 **Kumar, R., and Khurana, A.** (2014). Functional genomics of tomato: Opportunities and challenges in  
771 post-genome NGS era. *Journal of Bioences* 39:917-929.
- 772 **Lamia, A., Cynthia, D., Frédéric, G., Nathalie, F., Frédéric, D., Michel, H., and Christian, C.** (2015).  
773 Fruit growth-related genes in tomato. *J Exp Bot* 66:1075-1086.
- 774 **Lemaire-Chamley, M., Petit, J., Garcia, V., Just, D., Baldet, P., Germain, V., Fagard, M.,**  
775 **Mouassite, M., Cheniclet, C., and Rothan, C.** (2005). Changes in transcriptional profiles are  
776 associated with early fruit tissue specialization in tomato. *Plant Physiol* 139:750-769.
- 777 **Lescot, M., Dehais, P., Thijs, G., Marchal, K., Moreau, Y., Van de Peer, Y., Rouze, P., and**  
778 **Rombauts, S.** (2002). PlantCARE, a database of plant cis-acting regulatory elements and a portal to  
779 tools for in silico analysis of promoter sequences. *Nucl Acids Research* 30:325-327.
- 780 **Li, H., and Durbin, R.** (2009). Fast and accurate short read alignment with Burrows-Wheeler transform.  
781 *Bioinformatics* 25:1754-1760.
- 782 **Li, T., Yang, X., Yu, Y., Si, X., Zhai, X., Zhang, H., Dong, W., Cao, C., and Xu, C.** (2018).  
783 Domestication of wild tomato is accelerated by genome editing. *Nat Biotechnol* 36:1160-1167.
- 784 **Liljegren, S.J., Ditta, G.S., Eshed, Y., Savidge, B., and Yanofsky, M.F.** (2000). *SHATTERPROOF*  
785 *MADS*-box genes control seed dispersal in *Arabidopsis*. *Nature* 404:766-770.
- 786 **Lin, T., Zhu, G., Zhang, J., Xu, X., Yu, Q., Zheng, Z., Zhang, Z., Lun, Y., Li, S., and Wang, X., et al.**  
787 (2014). Genomic analysis provides insights into the history of tomato breeding. *Nat Genet*  
788 46:1220-1226.
- 789 **Liu, J., Li, C.Q., Dong, Y., Yang, X., and Wang, Y.Z.** (2018). Dosage imbalance of B- and C-class  
790 genes causes petaloid-stamen relating to F<sub>1</sub> hybrid variation. *Bmc Plant Biol* 18.
- 791 **Lye, Z.N., and Purugganan, M.D.** (2019). Copy number variation in domestication. *Trends Plant Sci*  
792 24:352-365.
- 793 **Macua, J.I., Santos, Á., Malumbres, Á., Campillo, C., Cebolla-Cornejo, J., Roselló S., Gervas, C.,**

- 794 **and Lahoz, I.** (2015). Processing tomato in Navarra - "All flesh" cultivars. *Acta Horticulturae*  
795 1081:175-180.
- 796 **Maheepala, D.C., Emerling, C.A., Rajewski, A., Macon, J., Strahl, M., Pabón-Mora, N., and Litt,**  
797 **A.** (2019). Evolution and diversification of *FRUITFULL* genes in solanaceae. *Front Plant Sci* 10:43.
- 798 **Members, B.D.C.** (2018). Database Resources of the BIG Data Center in 2018. *Nucleic Acids Res*  
799 46:D14-D20.
- 800 **Mounet, F., Moing, A., Garcia, V., Petit, J., Maucourt, M., Deborde, C., Bernillon, S., le Gall, G.L.,**  
801 **Colquhoun, I., and Defernez, M., et al.** (2009). Gene and metabolite regulatory network analysis  
802 of early developing fruit tissues highlights new candidate genes for the control of tomato fruit  
803 composition and development. *Plant Physiol* 149:1505-1528.
- 804 **Nunan, K.J., Sims, I.M., Bacic, A., Robinson, S.P., and Fincher, G.B.** (1998). Changes in cell wall  
805 composition during ripening of grape berries. *Plant Physiol* 118:783-792.
- 806 **Ocares, N., and Mejía, N.** (2016). Suppression of the D-class MADS-box *AGL11* gene triggers  
807 seedlessness in fleshy fruits. *Plant Cell Rep* 35:239-254.
- 808 **Pedro, P., Gallego, Donald, J., Huber, Ignacio, and Zarra.** (1991). Cell wall hydrolysis in tomato  
809 locule gel formation. *Hortence* 26:735.
- 810 **Pertea, M., Pertea, G.M., Antonescu, C.M., Chang, T.C., Mendell, J.T., and Salzberg, S.L.** (2015).  
811 StringTie enables improved reconstruction of a transcriptome from RNA-seq reads. *Nat Biotechnol*  
812 33:290-295.
- 813 **Pinyopich, A., Ditta, G.S., Savidge, B., Liljegren, S.J., Baumann, E., Wisman, E., and Yanofsky,**  
814 **M.F.** (2003). Assessing the redundancy of MADS-box genes during carpel and ovule development.  
815 *Nature* 424:85-88.
- 816 **Qin, G.Z., Wang, Y.Y., Cao, B.H., Wang, W.H., and Tian, S.P.** (2012). Unraveling the regulatory  
817 network of the MADS box transcription factor RIN in fruit ripening. *Plant J* 70:243-255.
- 818 **Rodriguez-Leal, D., Lemmon, Z.H., Man, J., Bartlett, M.E., and Lippman, Z.B.** (2017).  
819 Engineering quantitative trait variation for crop improvement by genome editing. *Cell* 171:470-480.
- 820 **Seymour, G., Poole, M., Manning, K., and King, G.J.** (2008). Genetics and epigenetics of fruit  
821 development and ripening. *Curr Opin Plant Biol* 11:58-63.
- 822 **Shahmuradov, I., Abdulazimova, A., Khan, F.Z., Solovyev, V., and Aliyev, J.** (2012). The PlantProm  
823 DB: Recent updates. International Conference on Biomedical Engineering and Biotechnology.  
824 2012:612-614.
- 825 **Sicard, A., Petit, J., Mouras, A., Chevalier, C., and Hernould, M.** (2010). Meristem activity during  
826 flower and ovule development in tomato is controlled by the mini zinc finger gene *INHIBITOR of*  
827 *MERISTEM ACTIVITY*. *Plant J* 55:415-427.
- 828 **Silvestri, G.** (2006). Mutant allele of tomato. US:US7112727.
- 829 **Sofia, M., Esra, C., Yury, T., Bino, R.J., Dilek, B., Hall, R.D., Jacques, V., and De, V.R.C.H.** (2007).

- 830 Tissue specialization at the metabolite level is perceived during the development of tomato fruit. *J*  
831 *Exp Bot* 58:4131-4146.
- 832 **Swinnen, G., Goossens, A., and Pauwels, L.** (2016). Lessons from Domestication: Targeting  
833 Cis-Regulatory Elements for Crop Improvement. *Trends Plant Sci* 21:506-515.
- 834 **Takagi, H., Abe, A., Yoshida, K., Kosugi, S., Natsume, S., Mitsuoka, C., Uemura, A., Utsushi, H.,**  
835 **Tamiru, M., and Takuno, S.** (2013). QTL-seq: Rapid mapping of quantitative trait loci in rice by  
836 whole genome resequencing of DNA from two bulked populations. *Plant J* 74:174-183.
- 837 **Takizawa, A., Hyodo, H., Wada, K., Ishii, T., Satoh, S., and Iwai, H.** (2014). Regulatory  
838 Specialization of Xyloglucan (XG) and Glucuronoarabinoxylan (GAX) in Pericarp Cell Walls  
839 during Fruit Ripening in Tomato (*Solanum lycopersicum*). *Plos One* 9:e89871.
- 840 **Tieman, D., Taylor, M., Schauer, N., Fernie, A.R., Hanson, A.D., and Klee, H.J.** (2006). Tieman, D.  
841 Et al. Tomato aromatic amino acid decarboxylases participate in synthesis of the flavor volatiles  
842 2-phenylethanol and 2-phenylacetaldehyde. *Proc. Natl. Acad. Sci. USA* 103, 8287-8291.
- 843 **Tieman, D.M., Harriman, R.W., Ramamohan, G., and Handa, A.K.** (1992). An antisense pectin  
844 methylesterase gene alters pectin chemistry and soluble solids in tomato fruit. *The Plant Cell*  
845 4:667-679.
- 846 **Tomato Genome and Consortium.** (2012). The tomato genome sequence provides insights into fleshy  
847 fruit evolution OPEN. *Nature* 485:635-641.
- 848 **Ulusik, S., Chapman, N.H., Smith, R., Poole, M., Adams, G., Gillis, R.B., Besong, T.M., Sheldon, J.,**  
849 **Stieglmeyer, S., and Perez, L., et al.** (2016). Genetic improvement of tomato by targeted control  
850 of fruit softening. *Nat Biotechnol* 34:950-952.
- 851 **Veitia, R.A., Bottani, S., and Birchler, J.A.** (2013). Gene dosage effects: Nonlinearities, genetic  
852 interactions, and dosage compensation. *Trends Genet* 29:385-393.
- 853 **Vrebalov, J., Pan, I.L., Arroyo, A.J.M., Mcquinn, R., Chung, M.Y., Poole, M., Rose, J., Seymour, G.,**  
854 **Grandillo, S., and Giovannoni, J.** (2009). Fleshy fruit expansion and ripening are regulated by the  
855 Tomato SHATTERPROOF gene *TAGL1*. *Plant Cell* 21:3041-3062.
- 856 **Wang, L., Li, J., Zhao, J., and He, C.Y.** (2015). Evolutionary developmental genetics of fruit  
857 morphological variation within the Solanaceae. *Front Plant Sci* 6:248.
- 858 **Wang, P., Liao, H., Zhang, W., Yu, X., Zhang, R., Shan, H., Duan, X., Yao, X., and Kong, H.** (2016).  
859 Flexibility in the structure of spiral flowers and its underlying mechanisms. *Nat Plants* 2:15188.
- 860 **Wang, Y., Song, F., Zhu, J., Zhang, S., Yang, Y., Chen, T., Tang, B., Dong, X.N., Chen, H.X., and**  
861 **Sun, M.Y., et al.** (2017). GSA: Genome sequence archive\*. *Genom Proteom Bioinf* 15:14-18.
- 862 **Wei, C., Liang, G., Guo, Z.L., Wang, W.S., Zhang, H.Y., Liu, X.Q., Yu, S.B., Xiong, L.Z., and Jie, L.**  
863 (2013). A novel integrated method for Large-Scale detection, identification, and quantification of  
864 widely targeted metabolites: Application in the study of rice metabolomics. *Mol Plant*:1769-1780.
- 865 **Wuest, S.E., O Maoileidigh, D.S., Rae, L., Kwasniewska, K., Raganelli, A., Hanczaryk, K., Lohan,**

- 866        **A.J., Loftus, B., Graciet, E., and Wellmer, F.** (2012). Molecular basis for the specification of  
867        floral organs by *APETALA3* and *PISTILLATA*. Proceedings of the National Academy of Sciences  
868        109:13452-13457.
- 869        **Xu, Z.H., and Chong, K.** (2015) Plant cell differentiation and organogenesis. Beijing, China.: The  
870        Science Publishing Company.
- 871        **Ying, S., Su, M., Wu, Y., Zhou, L., Fu, R., Li, Y., Guo, H., Luo, J., Wang, S., and Zhang, Y.** (2020).  
872        Trichome regulator SIMIXTA - like directly manipulates primary metabolism in tomato fruit. Plant  
873        Biotechnol J 18:354-363.
- 874        **Zhang, J.L., Wang, Y.C., Naeem, M., Zhu, M.K., Li, J., Yu, X.H., Hu, Z.L., and Chen, G.P.** (2019).  
875        An AGAMOUS MADS-box gene, *SIMBP3*, regulates the velocity of placenta liquefaction and seed  
876        formation in tomato. J Exp Bot 70:909-924.
- 877        **Zhu, G., Wang, S., Huang, Z., Zhang, S., Liao, Q., Zhang, C., Lin, T., Qin, M., Peng, M., and Yang,**  
878        **C., et al.** (2018). Rewiring of the fruit metabolome in tomato breeding. Cell 172:249-261.
- 879

880 TABLES

881 **Table 1.** The Traits of the Mature Fruit Locule Tissue of the Populations.

| Generation         | Population | Segregation |           | Theoretical Ratio | $\chi^2$ | Significance |
|--------------------|------------|-------------|-----------|-------------------|----------|--------------|
|                    |            | Normal      | All Flesh |                   |          |              |
| P1 (06-790)        | 20         | 0           | 20        | -                 | -        | -            |
| P2 (LA4069)        | 20         | 20          | 0         | -                 | -        | -            |
| F <sub>1</sub>     | 20         | 20          | 0         | -                 | -        | -            |
| F <sub>2</sub>     | 191        | 150         | 41        | 3:1               | 1.176    | N.s.         |
| BC <sub>1</sub> P1 | 88         | 46          | 42        | 1:1               | 0.102    | N.s.         |
| BC <sub>1</sub> P2 | 40         | 40          | 0         | -                 | -        | -            |

882

883 **FIGURE LEGENDS**

884

885 **Figure 1. Morphology and Micrograph of the Locule Tissues of Normal (WT) and All-Flesh**

886 **Fruit Tomato. (a)** The appearance of locule tissue at different developmental stages of WT

887 tomato LA4069 and all-flesh fruit tomato 06-790. **(b)** The cell structure of locule tissues of WT

888 and all-flesh fruit tomato at their mature green stage. Scale bars: (a), 1 cm; (b), 50  $\mu$ m.

889

890 **Figure 2. Map-based Cloning of the AFF Gene. (a)**  $\Delta$ (SNP index) from BSA-Seq. The *x*-axis is

891 the physical position of tomato chromosomes; the *y*-axis is the value of the SNP-index. **(b)** Initial

892 mapping of the AFF gene using 215 F<sub>2</sub> plants derived from a cross between 06-790 and LA4069.

893 **(c)** Genotypes and phenotypes of homozygous recombinant plants derived from 249 BC<sub>2</sub>S<sub>1</sub> plants

894 generated by continued backcrossing of 06-790 to H1706 (B51, B68, B228, B111, and B69 are

895 normal lines; B64 and B166 are all-flesh fruit lines). **(d)** Annotated gene models in Tomato SL4.0

896 ITAG4.0 (H1706) in the mapping region. These local genes are indicated by rectangles with

897 arrows. **(e)** Gene structure of *AFF*. The gray dashed-box represents the SV of 416-bp deletions in

898 the cis-regulatory region of the *AFF* gene. **(f)** The PCR results of different tomato varieties or

899 lines using the marker SV-12 designed by the 416-bp deletion. M: 100-bp DNA ladder.

900

901 **Figure 3. Characterization of CRISPR/Cas9-*aff* (*aff-cr*) Lines and Over-expression (*aff-over*)**

902 **Lines. (a)** Schematic illustrating single-guide RNA targeting the *AFF* coding sequence (red

903 triangle). **(b)** *aff-cr* mutants generated using CRISPR/Cas9. The red lines indicate the target sites

904 of the guide RNAs. The nucleotides underlined in black bold font represent the

905 protospacer-adjacent motif (PAM) sequences. *aff-cr* alleles identified by cloning and sequencing

906 PCR products of the *AFF*-targeted region from two T<sub>0</sub> plants under the MicoTom background. **(c)**

907 Representative fruit transection from CRISPR/Cas9-*aff* (*aff-cr*) lines compared with the wild-type

908 (WT) and over-expression (*aff-Over*) lines at 25 DAF. Scale bars: 1 cm.

909

910 **Figure 4. The Sequence Conservation of the *AFF* Promoter in *Solanaceae* Species and the**

911 **Tomato Population.** (a) Sequence conservation of *AFF* orthologous genes among five  
912 *Solanaceae* species. (b) Beanplot of  $\pi$  values for the three regions: the gene body, 5'UTR, and  
913 3'UTR of all genes. The 5'UTR region of gene *AFF* shows strong conservation compared to other  
914 genes in the tomato population. The yellow stars show the  $\pi$  values of the three regions of the *AFF*  
915 gene.

916

917 **Figure 5. The Expression of Gene *AFF* and the Phenotypes of Locule Tissues of WT and**  
918 **All-Flesh Tomato Fruits at Different Development Stages.** (a) qRT-PCR of *AFF* transcripts in  
919 different locule tissues and stages from 7 to 25 days after flowering (DAF). BA-130 and BA-150,  
920 all-flesh lines derived from BC<sub>2</sub>S<sub>1</sub> plants generated by the continued backcrossing of 06-790 to  
921 H1706. 09-1225 and 06-790 are all-flesh cultivars. 06-790×H1706, F<sub>1</sub> progeny, the all-flesh line  
922 06-790 was crossed to wild-type H1706. H1706 and LA4069 are normal cultivars obtained from  
923 TGRC. BA-124 and BA-128 are normal lines derived from BC<sub>2</sub>S<sub>1</sub> plants generated by continued  
924 backcrossing of 06-790 to H1706. Note: To normalize the expression data, the *SIFRG27*  
925 (*Solyc06g007510*) gene was used as the internal control (Cheng et al., 2017). The bars represent  
926 the standard deviation. (b) The longitudinal section of fruit locule tissue at different stages of the  
927 WT and *aff* NIL (PA-1) created by backcrossing of 06-790 to H1706 for six generations followed  
928 by two generations of selfing. Scale bars: 1 cm.

929

930 **Figure 6. The Ratio of Firefly and Renilla Luciferase Signals, as well as the Thousand-Seed**  
931 **Weight and the Seed Germination of *aff* NILs.** (a) Relative luciferase activity (the ratio of luc  
932 to Rluc) of the two constructs. pGreenII luc, the blank vector with the 35S promoter; pGreenII  
933 luc-Del, the vector with the *aff* promoter; pGreenII luc-WT, the vector with the *AFF* promoter.  
934 Different letters above the bars indicate statistically significant differences. \*\*: P < 0.01 (Student's  
935 t test). (b) The thousand-seed weight of four *aff* NILs. (c) The germination index of four *aff* NILs.  
936 (d) The seed germination percentage of four *aff* NILs. BA1-1 and BA2-1 are all-flesh lines  
937 derived from BC<sub>6</sub>S<sub>2</sub> plants generated by 06-790 continued backcrossing to H1706; BA4-1 and  
938 BA6-1 are normal lines derived from BC<sub>6</sub>S<sub>2</sub> plants generated by 06-790 continued backcrossing to  
939 H1706. The bars represent the standard deviation.



940

941 **Figure 7. The Differential Gene Expression and Metabolite Contents between Fruits from**  
942 **the All-Flesh and WT Tomatoes.** The significantly enriched GO terms (a) and KEGG pathways  
943 (b) of differentially expressed genes between locule tissues from the all-flesh fruit and WT  
944 tomatoes. (c) The principal component analysis of metabolites from the locule and placenta of WT  
945 and all-flesh fruit tomatoes. WT-L: locule tissue of WT tomatoes; WT-P: placenta tissue of WT  
946 tomatoes; AFF-L: locule tissue of all-flesh fruit tomatoes; AFF-P: placenta tissue of all-flesh fruit  
947 tomatoes.
